1 **Ethanol's action at BK channels accelerates the transition from moderate to excessive**  
2 **alcohol consumption**

3  
4 Agbonlahor Okhwarobo<sup>1</sup>, Max Kreifeldt<sup>1</sup>, Pushpita Bhattacharyya<sup>1</sup>, Alex M Dopico<sup>2</sup>, Amanda J  
5 Roberts<sup>3</sup>, Gregg E Homanics<sup>4</sup>, Candice Contet<sup>1\*</sup>

6  
7 Affiliations:

8 <sup>1</sup> The Scripps Research Institute, Department of Molecular Medicine, La Jolla, CA

9 <sup>2</sup> University of Tennessee Health Science Center, Department of Pharmacology, Addiction  
10 Science, and Toxicology, Memphis, TN

11 <sup>3</sup> The Scripps Research Institute, Animals Models Core Facility, La Jolla, CA

12 <sup>4</sup> University of Pittsburgh, Department of Anesthesiology and Perioperative Medicine,  
13 Pittsburgh, PA

14

15 **\* Corresponding author**

16 Candice Contet

17 Address: The Scripps Research Institute, 10550 N Torrey Pines Road, SR-107, La Jolla, CA  
18 92037, USA

19 Phone: 858 784 7209

20 Email: [contet@scripps.edu](mailto:contet@scripps.edu)

21

22 **Short title:** BK channels in alcohol dependence

23

24 **Keywords:** *Kcnma1*, Slo1, Maxi-K, knockin, vapor, inhalation, dependence, intermittent,  
25 abstinence

26 **Abstract**

27 Large conductance potassium (BK) channels are among the most sensitive molecular targets of  
28 ethanol. Whether the action of ethanol at BK channels influences the motivation to drink alcohol  
29 remains to be determined. In the present study, we sought to investigate the behavioral  
30 relevance of this interaction by introducing in the mouse genome a point mutation (BK  $\alpha$  K361N)  
31 known to render BK channels insensitive to ethanol while preserving their physiological function.  
32 We demonstrate that preventing ethanol's interaction with BK channels at this site hinders the  
33 escalation of voluntary alcohol intake induced by repeated cycles of alcohol intoxication and  
34 withdrawal. In contrast, the mutation does not alter ethanol's acute behavioral effects, nor the  
35 metabolic and activity changes induced by chronic exposure to alcohol. Our findings point at BK  
36 channel ethanol-sensing capacity as a vulnerability mechanism in the transition from moderate  
37 alcohol consumption to pathological patterns of alcohol abuse.

## 38 **Introduction**

39 Calcium- and voltage-activated, large conductance potassium (BK) channels are one of the  
40 primary molecular targets of ethanol in the brain [1-3]. Depending on multiple molecular  
41 determinants (e.g., intracellular calcium concentration, alternative splicing, subunit composition,  
42 posttranslational modifications, lipid microenvironment), ethanol can either potentiate or reduce  
43 BK channel-mediated currents [reviewed in 4]. Whether the action of ethanol on mammalian BK  
44 channels mediates the behavioral effects of ethanol and influences the motivation to drink  
45 alcohol remains to be determined. Filling this gap of knowledge has critical implications for the  
46 understanding and treatment of alcohol use disorders (AUD) as it would support or put into  
47 question the potential of BK channels as a relevant therapeutic target in AUD.

48 Until now, the contribution of BK channels to the behavioral effects of ethanol has been studied  
49 by genetically manipulating the pore-forming  $\alpha$  subunit in worms and flies, and the auxiliary  $\beta$   
50 subunits in mice. Studies in invertebrates yielded disparate results, as BK  $\alpha$  mediates the  
51 intoxicating effects of ethanol in worms [5, 6] while it mediates rapid tolerance to ethanol-  
52 induced sedation and increased seizure susceptibility in flies [7-11]. In mice, deletion of BK  $\beta$ 4  
53 promotes rapid tolerance to the locomotor depressant effect of ethanol [12] and attenuates  
54 ethanol drinking escalation in ethanol-dependent mice [13]. Conversely, deletion of BK  $\beta$ 1  
55 accelerates drinking escalation in dependent mice [13] and reduces chronic tolerance to  
56 ethanol-induced sedation and hypothermia [14]. These findings suggest that BK auxiliary  
57 subunits play a role in the adaptive response to chronic ethanol exposure in mammals but fail to  
58 provide a direct insight into the role of ethanol's interaction with BK pore-forming subunit in  
59 alcohol-related behaviors.

60 In the present study, we sought to establish whether the action of ethanol at BK channels  
61 contributes to excessive alcohol drinking in a mouse model of alcohol dependence. We first  
62 show the limitations of currently available pharmacological modulators of BK channels to

63 address this question and then turn to a genetic approach to block the interaction of ethanol with  
64 BK  $\alpha$  without affecting basal BK channel function, by introducing a point mutation (K361N)  
65 known to selectively abolish BK channel activation by ethanol *in vitro* [15]. Our results  
66 demonstrate the key role of this BK channel ethanol-sensing site in the escalation of alcohol  
67 intake upon dependence induction. We further demonstrate that this role is not related to a  
68 differential sensitivity to ethanol's acute behavioral effects or to the metabolic and activity  
69 alterations induced by chronic exposure to ethanol. These findings provide tangible support for  
70 disabling the BK channel ethanol-sensing capacity as a strategy to hinder the transition from  
71 casual, moderate alcohol consumption to pathological patterns of alcohol abuse.

72

## 73 **Materials and Methods**

### 74 ***Animals***

75 C57BL/6J mice were obtained from The Jackson Laboratory or from The Scripps Research  
76 Institute (TSRI) rodent breeding colony. BK $\alpha$  K361N knockin (KI) mice were generated at the  
77 University of Pittsburgh. Breeders were sent to TSRI, where a colony was maintained by mating  
78 heterozygous (Het) males and females such that experimental mice were littermates. KI males  
79 were backcrossed to C57BL/6J females every 1-2 years to prevent genetic drift.  
80 Mice were maintained on a 12 h/12 h light/dark cycle. Food (Teklad LM-485, Envigo) and  
81 acidified or reverse osmosis purified water were available *ad libitum*. Sani-Chips (Envigo) were  
82 used for bedding substrate. All experiments were conducted in males and behavioral testing  
83 was started when they were at least 10 weeks old. Mice were single-housed for drinking  
84 experiments and group-housed otherwise. Testing was conducted during the dark phase of the  
85 circadian cycle, except for conditioned place preference, which was conducted during the light  
86 phase.

87 All procedures adhered to the National Institutes of Health Guide for the Care and Use of  
88 Laboratory Animals and were approved by the Institutional Animal Care and Use Committees of  
89 the University of Pittsburgh and TSRI.

90

### 91 **Generation of *BKα K361N* KI mice**

92 KI mice were produced using CRISPR/Cas9 technology as previously described in detail [16].  
93 Briefly, a sgRNA targeting *Kcnma1* in exon 9 near the intended mutation site was identified  
94 using the CRISPR Design Tool [17]. Two overlapping PCR primers (forward: GAAATTAATACG  
95 ACTCACTATAGGAGTGTCTCTAACTTCCTGAGTTTTAGAGCTAGAAATAGC; R: AAAAGCA  
96 CCGACTCGGTGCCACTTTTTCAAGTTGATAACGGACTAGCCTTATTTAACTTGCTATTTCT  
97 AGCTCTAAAAC) were used to generate a T7 promoter containing sgRNA template as  
98 described (Bassett et al., 2014). The sgRNA and Cas9 mRNA were produced by *in vitro*  
99 translation, purified (MEGAclear Kit, Ambion), ethanol precipitated, and resuspended in DEPC  
100 treated water. A 120-nucleotide single stranded DNA repair template oligonucleotide harboring  
101 the desired mutations in exon 9 of *Kcnma1* was purchased as Ultramer DNA (Integrated DNA  
102 Technologies, Coralville, IA). sgRNA (25 ng/μl), Cas9 mRNA (50 ng/μl), and repair oligo (100  
103 ng/μl) were combined and injected into the cytoplasm C57BL/6J one-cell embryos as described  
104 [18]. Embryos that survived injection were transferred to the oviduct of day 0.5 post-coitum  
105 pseudo-pregnant CD-1 recipient females. Pups resulting from injected embryos were screened  
106 for DNA sequence changes in exon 9 of the *Kcnma1* gene by PCR/DNA sequence analysis. A  
107 male founder mouse harboring the desired changes was mated to C57BL/6J females to  
108 establish the KI line. The *Kcnma1* exon 9 containing amplicon from all Het F1 animals that were  
109 shipped for the TSRI breeding colony were sequenced to verify the fidelity of the mutated locus.  
110 The founder mouse harbored no off-target mutations (data not shown) in any of the top 7 off-  
111 target sites predicted by the Off –Targets tool of the Cas9 Online Designer [19].

112 Mice were genotyped by subjecting tail clip lysates to polymerase chain reaction (PCR) using a  
113 pair of primers (forward: GCTTTGCCTCATGACCCTCT; reverse: TGAACAAGGGTGCTGCTTC  
114 A) that amplifies a 450-bp fragment of the *Kcnma1* gene. The PCR products were then digested  
115 with Tru1I and the resulting fragments were visualized by electrophoresis in an ethidium  
116 bromide-stained agarose gel. Tru1I digestion yielded two fragments (107 + 343 bp) in the wild-  
117 type (WT) allele and three fragments (107 + 149 + 194 bp) in the KI allele (see KI-specific Tru1I  
118 site in **Fig. 2A**).

119 To verify that the mutation was also present in *Kcnma1* mRNA, RNA was isolated from a KI  
120 mouse brain hemisphere using the RNeasy Plus Universal Mini Kit (Qiagen, 73404), 2 µg of  
121 RNA was reverse-transcribed using the Transcriptor First Strand cDNA Synthesis Kit with  
122 random hexamer primers (Roche, 04379012001), and a 370-bp fragment (nucleotides 1304-  
123 1673 of NM\_010610.3) was amplified from the resulting cDNA. This fragment was cloned into  
124 pBluescript II and sequenced with a T3 primer (Genewiz).

125

### 126 ***Experimental cohorts***

127 Independent cohorts of C57BL/6J males were used to test the effects of penitrem A on tremors  
128 (n=28), alcohol drinking (n=20) and saccharin drinking (n=20), as well as the effects of paxilline  
129 (n=18) and BMS-204352 (n=30) on alcohol drinking.

130 Body weights were measured in experimentally naïve mice at 6 weeks of age (WT, n=7; Het,  
131 n=12; KI, n=6). Three independent cohorts of mice, each containing an equivalent number of  
132 WT and KI mice, were tested for alcohol drinking and their data were pooled for analysis (WT,  
133 n=21; KI, n=17). Ethanol clearance rate was measured in another cohort (WT, n=3; Het, n=4;  
134 KI, n=4). Separate cohorts were tested for ethanol-induced ataxia, sedation, and hypothermia  
135 (WT, n=10; Het, n=11; KI, n=8), ethanol-induced analgesia (WT, n=7; Het, n=9; KI, n=7), and  
136 conditioned place preference (WT, n=11; KI, n=15). Two additional cohorts were used to

137 measure activity/metabolism (WT, n=8; KI, n=7) and circadian rhythmicity (WT, n=8; KI, n=8)  
138 during withdrawal from chronic intermittent ethanol (CIE) exposure.

139

#### 140 ***Ethanol drinking***

141 Mice were single-housed 3 days before testing started and remained single-housed throughout  
142 the duration of the experiment. Voluntary ethanol consumption was assessed in 2-h sessions  
143 during which mice had access to a bottle of water and a bottle of 15% (v:v) ethanol (two-bottle  
144 choice [2BC]) in their home cage. 2BC sessions started at the beginning of the dark phase  
145 (except for the penitrem A study, in which sessions were started 2 h into the dark phase) and  
146 were conducted Mon-Fri. The position of the ethanol and water bottles was alternated each day  
147 to control for side preference. Ethanol intake was determined by weighing bottles before and  
148 after the session, subtracting the weight lost in bottles placed in an empty cage (to control for  
149 spill/evaporation) and dividing by the mouse bodyweight (measured weekly). A similar  
150 procedure was used to assess saccharin (0.005% w:v) consumption in the penitrem A study.

151

#### 152 ***Pharmacological modulation of BK channels***

153 Penitrem A was purchased from Sigma (P3053) for tremor assessment and from Enzo Life  
154 Sciences (BML-KC157) for drinking experiments. It was dissolved in dimethylsulfoxide (DMSO)  
155 at 10 mg/mL and diluted in saline for intraperitoneal (i.p.) injection (0.1 mL per 10 g body  
156 weight). The final concentration of DMSO was 50% for the 0.2 and 0.5 mg/kg doses, and 10%  
157 for the 0.05 and 0.1 mg/kg doses. The effects of penitrem A on tremor, ethanol drinking, and  
158 saccharin drinking were tested in three independent cohorts. Tremors were scored according to  
159 the following scale [20]: 0 = no tremor; 1 = no resting tremor, short-lasting low-intensity shaking  
160 elicited by handling; 2 = no resting tremor, continuous low-intensity shaking elicited by handling;  
161 3 = spontaneous low-intensity tremor, aggravated by handling; 4 = severe spontaneous tremor,

162 convulsive episode elicited by handling; score 5 was not observed. For drinking experiments,  
163 penitrem A was injected 30 min prior to 2BC session start.  
164 Paxilline was purchased from Sigma (P2928), dissolved in DMSO at 10 mM and diluted in  
165 phosphate-buffered saline (137 mM NaCl, 2.7 mM KCl, 1.8 mM KH<sub>2</sub>PO<sub>4</sub>, 10.1 mM Na<sub>2</sub>HPO<sub>4</sub>, pH  
166 7.4) for i.p. injection (1:2000 for 22 µg/kg dose, 1:400 for 110 µg/kg dose, 1:80 for 550 µg/kg  
167 dose). Each dose was tested on a different week. Doses were tested in ascending order, and  
168 vehicle and drug treatments were counterbalanced over two consecutive days for each dose.  
169 This dose range was selected based on pilot testing that indicated reduced mobility at 1.1 mg/kg  
170 and tremors at 4.4 mg/kg, which would have confounded drinking behavior, as well as on  
171 reported anticonvulsant properties of ultra-low-dose paxilline [21].  
172 BMS-204352 was purchased from Sigma (SML1313), dissolved in DMSO at 16 mg/mL and  
173 diluted in Tween-80:saline at a 1:1:80 ratio for i.p. injection. A dose of 2 mg/kg was selected  
174 based on its ability to reverse behavioral abnormalities in *Fmr1* mutant mice [22, 23].

175

### 176 ***Ethanol drinking escalation***

177 CIE vapor inhalation was used to induce dependence and increase voluntary ethanol drinking in  
178 2BC sessions, as described in [13, 24]. Mice were first subjected to ten 2BC sessions (Mon-Fri)  
179 and each genotype was split into two groups of equivalent baseline ethanol intake. Weeks of  
180 CIE (or air) inhalation (4 x 16-h intoxication/8-h withdrawal, Mon-Fri) were then alternated with  
181 weeks of 2BC (Mon-Fri) for a total of 3-5 rounds.

182 The inhalation chambers were made of sealed plastic mouse cages (Allentown). An electronic  
183 metering pump (Iwaki EZB11D1-PC) dripped 95% ethanol into a flask placed on a warming tray  
184 at a temperature of 50°C. Drip rate was adjusted to achieve target blood ethanol concentrations  
185 (BECs) of 150-250 mg/dL. An air pump (Hakko HK-80L) conveyed vaporized ethanol from the  
186 flask to each individual chamber. The air flow was set at a rate of 15 L/min for each pair of  
187 chambers. Each chamber was diagonally divided by a mesh partition to provide single housing



188 for two mice. Mice were injected i.p. with ethanol (1.5 g/kg, PHARMCO-AAPER, 111000200)  
189 and pyrazole (68 mg/kg, Sigma-Aldrich, P56607) diluted in saline, in a volume of 0.1 mL/10 g  
190 body weight, before each 16-h ethanol vapor inhalation session. Blood was sampled from the  
191 caudal vein at the end of a 16-h intoxication session. The tip of the tail was nicked with a scalpel  
192 blade, blood was collected with a heparinized capillary tube and centrifuged at 13,000 g for 10  
193 min. BECs were measured using a GM7 analyzer (Analox) or by gas chromatography and flame  
194 ionization detection (Agilent 7820A). On CIE weeks, control (Air) mice received pyrazole only.

195

### 196 ***Motor coordination and ethanol-induced ataxia***

197 Motor coordination was evaluated using an AccuRotor rotarod (Accuscan Instruments)  
198 accelerating from 4 to 40 rpm over 300 s. Mice were positioned on the rotating rod and speed at  
199 fall (rpm) was recorded. For motor learning, mice were subjected to 5 trials per day (30-90 min  
200 apart) for 3 consecutive days. For ataxia testing, the rod was rotating at a constant speed of 8  
201 rpm and the mice had to stay on the rod for at least 30 s to pass. Ataxia testing was conducted  
202 4-5 days after the last training trial and all mice were able to pass the criterion. They were then  
203 i.p. injected with 1.5 g/kg ethanol (0.1 mL/10 g body weight) and tested approximately every 4  
204 min until they were able to pass the criterion again. At this point, blood was collected from the  
205 retroorbital sinus and processed for BEC determination using a GM7 analyzer (Analox  
206 Instruments, London, UK).

207

### 208 ***Ethanol-induced sedation and hypothermia***

209 Baseline body temperatures were first determined using a MicroTherma 2K thermometer  
210 (ThermoWorks) fitted with a rectal probe. Mice were then i.p. injected with 3.5 g/kg ethanol (0.2  
211 mL/10 g body weight), which resulted in loss of righting reflex (i.e., sedation). Mice were placed  
212 on their back and the time at which each mouse regained its righting reflex was recorded. At this

213 point, retroorbital blood was sampled and BECs were determined using a GM7 analyzer. Body  
214 temperatures were again recorded 60 and 120 min after injection.

215

### 216 ***Ethanol-induced analgesia***

217 A digital Randall-Selitto apparatus (Harvard Apparatus 76-0234) was used to measure  
218 mechanical nociceptive thresholds, as described in [25]. The mouse was habituated to enter a  
219 restrainer made of woven wire (stainless steel 304L 200 mesh, Shanghai YiKai) over the course  
220 of 3 days. On testing days, the mouse was gently introduced into the restrainer and the distal  
221 portion of the tail was positioned under the conic tip of the apparatus. The foot switch was then  
222 depressed to apply uniformly increasing pressure onto the tail until the first nociceptive  
223 response (struggling or squeaking) occurred. The force (in g) eliciting the nociceptive response  
224 was recorded. A cutoff force of 600 g was enforced to prevent tissue damage. The measure  
225 was repeated on the medial and proximal parts of the tail of the same mouse, with at least 30  
226 seconds between each measure. The average of the three measures (distal, medial, proximal)  
227 was used as nociceptive value for that day. The analgesic effect of ethanol was tested over 4  
228 consecutive days using a Latin square design. Testing was conducted 5 min after i.p. injection  
229 of 20% v:v ethanol (0, 1.5, 2 and 2.5 g/kg, 0.1-0.17 mL/10 g body weight).

230

### 231 ***Ethanol conditioned place preference***

232 The apparatus was made of matte black acrylic and consisted of a 42 cm long x 21 cm wide x  
233 31 cm high rectangular box (inner dimensions) with a removable central divider (ePlastics, San  
234 Diego). In one compartment, the floor was covered with coarse mesh (stainless steel 304L 10  
235 mesh, Shanghai YiKai) and the walls were decorated with white discs (5-cm dot sticker,  
236 ChromaLabel). In the other compartment, the floor was smooth and the walls were uniformly  
237 black. Pre-conditioning, conditioning, and post-conditioning trials were conducted on  
238 consecutive days, 2 h into the light phase of the circadian cycle. During the pre-conditioning and

239 post-conditioning tests, mice had access to both compartments during 15 min and their motion  
240 was video-recorded by a ceiling-mounted camera connected to ANY-maze (Stoelting Co., Wood  
241 Dale, IL). During the conditioning trials, the mice were i.p. injected with saline or 2 g/kg ethanol  
242 (20% v:v, 0.13 mL/10 g body weight) and immediately confined to the compartment paired with  
243 this treatment during 30 min. A biased design was used to assign compartments to saline or  
244 ethanol for each mouse, i.e., ethanol was always assigned to the least favorite compartment  
245 (mesh floor for 6 WT and 9 KI mice, smooth floor for 5 WT and 6 KI mice). Treatments were  
246 alternated for a total of 8 conditioning trials (4 saline and 4 ethanol) and the order of treatment  
247 was counterbalanced within each genotype. Conditioned place preference was reflected by an  
248 increase in the time spent in the ethanol-paired compartment after vs. before conditioning.

249

#### 250 ***Ethanol clearance rate***

251 Mice were i.p. injected with 2 g/kg ethanol (20% v:v, 0.13 ml/10 g body weight). Tail vein blood  
252 was collected 30 min, 90 min and 180 min later and processed for BEC determination by gas  
253 chromatography and flame ionization detection.

254

#### 255 ***Metabolism and sleep***

256 Mice were exposed to CIE every other week, starting with a priming week at sub-intoxicating  
257 BECs (WT,  $46.2 \pm 3.4$  mg/dL; KI,  $46.0 \pm 10.3$  mg/dL), and followed by 4 weeks at intoxicating  
258 BECs (WT,  $156.0 \pm 9.6$  mg/dL; KI,  $127.4 \pm 3.4$  mg/dL). Body composition was analyzed by  
259 quantitative nuclear magnetic resonance (EchoMRI 3-in-1, EchoMRI LLC, Houston, TX) 72 h  
260 after the last vapor exposure. Mice were then immediately placed in metabolic cages  
261 (Comprehensive Laboratory Animal Monitoring System, Oxymax, Columbus Instruments,  
262 Columbus, OH), at the beginning of the dark phase. The following data were collected every 18  
263 min for a total of 108 h: oxygen consumption ( $VO_2$ ), carbon dioxide production ( $VCO_2$ ), food  
264 intake, water intake, and locomotor activity. The respiratory exchange ratio (RER), calculated as

265  $VCO_2/VO_2$ , provides an indicator of the substrate being metabolized, ranging from 0.7 when the  
266 predominant fuel source is fat to 1 when the predominant fuel source is carbohydrate [26].  
267 Locomotor activity counts (beam interruptions) were used by CLAMS-HC Sleep Detection  
268 function to track sleeping bouts, as defined by 4 (or more) consecutive 10-sec epochs with 0  
269 activity counts [27]. The first 12 hours (dark phase) were considered habituation and excluded  
270 from analysis. The following 96 h were binned by 12-h light and dark phases and averaged  
271 across the 4 days for statistical analysis.

272

### 273 ***Circadian rhythmicity***

274 Mice were exposed to CIE every other week for a total of 4 weeks (average BECs: WT,  $132.2 \pm$   
275  $8.5$  mg/dL; KI,  $129.7 \pm 9.3$  mg/dL) and transferred to individual locomotor activity cages  
276 (Photobeam Activity System-Home Cage, San Diego Instruments, San Diego, CA) 72 h after  
277 the last vapor exposure. Mice were maintained on a 12 h/12 h light/dark cycle for 7 consecutive  
278 days, then switched to constant darkness for an additional 11 days. Ambulation counts  
279 represent consecutive beam breaks (8 x 4 beams in the 18.5" x 10" frame) and were collected in  
280 1-h bins. Chi-square periodogram analysis was conducted in R ('zeitgebr' package,  
281 <https://github.com/rethomics/zeitgebr>) to determine the circadian period length and relative  
282 power during constant darkness [28, 29], using the last 240 hours of recording and a 6-min  
283 resampling rate (see **Fig. 6B**).

284

### 285 ***Data analysis***

286 Data were analyzed in Statistica 13.3 (Tibco Software Inc., Palo Alto, CA). Distribution normality  
287 was evaluated using a Shapiro-Wilk test and parametric/non-parametric tests were selected  
288 accordingly for analysis of variance (ANOVA). Tests using  $t$  and  $z$  distributions were two-tailed.  
289 Tremor scores were analyzed by Kruskal-Wallis ANOVA of the area under the curve. Saccharin  
290 drinking was analyzed by Friedman ANOVA and pairwise comparisons were conducted using

291 Wilcoxon tests. Ethanol drinking was analyzed by repeated-measures (RM) ANOVA for  
292 pharmacological experiments, unpaired t-test for baseline intake in WT/KI mice, or two-way  
293 ANOVA with genotype (WT, KI) and vapor (Air, CIE) as between-subject variables (weekly  
294 averages). *Posthoc* tests and planned comparisons were conducted using Tukey's test. The  
295 effect of genotype on ataxia and sedation was analyzed by one-way ANOVA. Ethanol's  
296 clearance rate was analyzed by two-way RM-ANOVA, with time as within-subject variable and  
297 genotype as between-subject variable. The hypothermic, analgesic, and rewarding effects were  
298 also analyzed by two-way RM-ANOVA, with time, dose, or conditioning, respectively, as within-  
299 subject variable and genotype as between-subject variable. EchoMRI data, circadian period  
300 length and relative power were analyzed by two-way ANOVA (genotype, vapor). CLAMS data  
301 were analyzed by three-way RM-ANOVA, with phase as within-subject variable and genotype  
302 and vapor as between-subject variables. When there was a significant interaction between  
303 phase and vapor, two-way ANOVAs were further conducted for each phase. Data are  
304 expressed as mean  $\pm$  s.e.m.

305

## 306 **Results**

### 307 ***Non-tremorgenic pharmacological modulation of BK channel activity does not alter*** 308 ***voluntary ethanol consumption***

309 We first sought to examine the contribution of BK channels to voluntary ethanol consumption  
310 and dependence-induced intake escalation using a pharmacological approach in C57BL/6J  
311 males. Since ethanol can activate neuronal BK channels, we hypothesized that blocking BK  
312 channels may interfere with the motivational properties of ethanol and increase (to overcome  
313 BK channel blockade) or decrease (if blockade is unsurmountable) ethanol drinking.

314 We first used penitrem A, a brain-penetrant fungal alkaloid that potently inhibits BK channels  
315 [30, 31]. Penitrem A induced tremors in a dose-dependent manner (**Fig. 1A**, main effect of  
316 dose:  $H_{3,24}=23.4$ ,  $p<0.0001$ ; *posthoc* tests:  $p<0.05$  vehicle vs 0.2 mg/kg;  $p<0.001$  vehicle vs 0.5  
317 mg/kg), as reported previously [32]. The dose of 0.2 mg/kg abolished both ethanol (**Fig. 1B**,  
318 dose effect:  $F_{3,57}=65.5$ ,  $p<0.0001$ ; *posthoc* test,  $p=0.0002$  vehicle vs 0.2 mg/kg penitrem A) and  
319 saccharin (**Fig. 1C**, dose effect:  $X^2_{3,19}=36$ ,  $p<0.0001$ ; *posthoc* test,  $p=0.0001$  vehicle vs 0.2  
320 mg/kg penitrem A) drinking. The dose of 0.1 mg/kg reduced ethanol intake ( $p=0.004$ ) without  
321 affecting saccharin intake ( $p=0.97$ ). The lowest dose of 0.05 m/kg did not affect ethanol ( $p=0.95$ )  
322 or saccharin ( $p=0.68$ ) intake (**Fig. 1B-C**). Based on our previous findings in BK  $\beta 1$  and  $\beta 4$   
323 knockout (KO) mice [13], we reasoned that an effect of BK channel blockade may selectively  
324 emerge in dependent mice that exhibit higher levels of ethanol intake. Accordingly, mice were  
325 exposed to CIE to escalate their voluntary ethanol drinking (**Fig. 1B vs Fig. 1D**, effect of vapor:  
326  $F_{1,9}=141.7$ ,  $p<0.0001$ ). Under these conditions, the two lowest doses of penitrem A did not alter  
327 ethanol intake (**Fig. 1D**, dose effect:  $F_{2,16}=0.7$ ,  $p=0.52$ ).

328 Tremorgenic mycotoxins can inhibit BK channels via different mechanisms and may therefore  
329 have a differential effect on ethanol-induced potentiation of BK-mediated currents. Notably, the  
330 association of  $\beta 1$  subunits reduces BK channel sensitivity to penitrem A by 10-fold, while it does  
331 not affect sensitivity to paxilline, a highly selective BK channel blocker [31, 33]. Since  $\beta 1$   
332 subunits influence ethanol intake escalation in CIE-exposed mice [13], we next tested the effect  
333 of paxilline in both non-dependent (Air) and dependent (CIE) mice. We limited our analysis to  
334 non-tremorgenic doses (see *Methods* for dose range determination). Paxilline did not affect  
335 ethanol intake regardless of the alcohol dependence status (**Fig. 1E**, dose effect:  $F_{3,48}=1.0$ ,  
336  $p=0.42$ ; vapor effect:  $F_{1,16}=11.0$ ,  $p=0.004$ ; dose x vapor interaction:  $F_{3,48}=0.27$ ,  $p=0.85$ ).

337 To further investigate the ability of BK channels to modulate ethanol intake, we tested the effect  
338 of a BK channel opener, BMS-204352. At 2 mg/kg, a dose that rescues several behavioral

339 deficits of *Fmr1* KO mice [22, 23], BMS-204532 did not impact moderate (Air) or excessive  
340 (CIE) ethanol drinking (**Fig. 1E**, treatment effect:  $F_{1,28}=0.1$ ,  $p=0.73$ ; vapor effect:  $F_{1,28}=28.5$ ,  
341  $p<0.0001$ ; treatment x vapor interaction:  $F_{1,28}=0.6$ ,  $p=0.45$ ).

342

### 343 **Generation and validation of BK $\alpha$ K361N knockin mice**

344 The significance of pharmacological manipulations is inherently limited because they perturb the  
345 physiological activity of BK channels rather than selectively antagonizing the effect of ethanol at  
346 BK channels. We therefore turned to a genetic approach to probe the role of ethanol's action at  
347 BK channels in the motivation to consume alcohol. Bukiya and colleagues discovered that an  
348 asparagine substitution of residue K361 of the mouse BK  $\alpha$  subunit abolishes ethanol's ability to  
349 increase BK channel steady-state activity without affecting unitary conductance, calcium  
350 sensitivity, and voltage sensitivity, thereby providing a unique opportunity to directly and  
351 selectively disrupt the effect of ethanol on BK channels [15].

352 Accordingly, we generated a knockin (KI) mouse expressing the K361N mutant instead of the  
353 wildtype (WT) BK  $\alpha$  on a C57BL/6J background. A CRISPR/Cas9 strategy was used to  
354 introduce two nucleotide mutations in the *Kcnma1* gene: A G-to-T missense mutation modifying  
355 the triplet encoding K361 into an asparagine-coding triplet, and a silent G-to-T mutation  
356 introducing a Tru1I restriction site to facilitate mouse genotyping (**Fig. 2A**). KI mice were viable  
357 and all three genotypes (KI, Het, and WT) were obtained in Mendelian proportions. The  
358 presence of the mutations in the *Kcnma1* mRNA was verified by mouse brain cDNA sequencing  
359 (**Fig. 2B**). We conducted behavioral assessments to verify that the basal function of BK  
360 channels was preserved in KI mice, based on the known phenotype of mice missing BK  $\alpha$ .  
361 Accordingly, while BK  $\alpha$  KO mice displayed 15-20% smaller body weights than their WT  
362 counterparts at 4 and 8 weeks of age [34], we found no effect of the K/N361 genotype on body

363 weight at 6 weeks of age (**Fig. 2C**,  $F_{2,22}=0.4$ ,  $p=0.70$ ). Furthermore, while BK  $\alpha$  KO mice  
364 displayed major motor coordination deficits [34], BK  $\alpha$  K361N KI mice acquired the accelerating  
365 rotarod task at the same rate as their Het and WT counterparts (**Fig. 2D**, effect of trial:  
366  $F_{14,336}=37.2$ ,  $p<0.0001$ ; effect of genotype:  $F_{2,24}=0.8$ ,  $p=0.48$ ; trial x genotype interaction:  
367  $F_{28,336}=0.8$ ,  $p=0.73$ ).

368

369 ***The BK  $\alpha$  K361N mutation hinders escalation of voluntary alcohol intake in the CIE-2BC***  
370 ***model of dependence***

371 BK  $\alpha$  WT and K361N KI mice were given access to voluntary alcohol consumption in limited-  
372 access 2BC sessions (**Fig. 3A**). There was a trend for higher intake in KI mice during the first  
373 week ( $t_{36}=-1.9$ ,  $p=0.066$ ) but the difference subsided by the second week ( $t_{36}=-1.0$ ,  $p=0.33$ ), with  
374 the two genotypes stabilizing at similar levels. Mice were then exposed to weeks of CIE (or Air  
375 only) to trigger voluntary intake escalation during intercalated weeks of 2BC drinking (**Fig. 3B**).  
376 Average BECs in WT and KI mice were  $189.6 \pm 14.2$  mg/dL and  $192.9 \pm 18.0$  mg/dL,  
377 respectively ( $t_{28}=-0.1$ ,  $p=0.89$ ). As expected, there was a significant week x vapor interaction  
378 ( $F_{4,136}=4.1$ ,  $p=0.0039$ ), reflecting the escalation of voluntary alcohol consumption in CIE-  
379 exposed mice. During the fourth postvapor week (PV4), planned comparisons detected a  
380 significant difference between Air- and CIE-exposed WT mice ( $p=0.010$ ), but not between Air-  
381 and CIE-exposed KI mice ( $p=0.76$ ), indicating that, by PV4, ethanol consumption had escalated  
382 in WT but not KI mice. Furthermore, CIE-exposed WT mice consumed significantly more alcohol  
383 than their KI counterparts ( $p=0.014$ ), while there was no difference between Air-exposed WT  
384 and KI mice ( $p=0.99$ ). In conclusion, the BK  $\alpha$  K361N mutation does not affect moderate alcohol  
385 drinking but hinders the transition to excessive alcohol intake elicited by vapor exposure.

386



387 ***The BK  $\alpha$  K361N mutation does not affect sensitivity to acute effects of alcohol***

388 We sought to determine whether the reduced propensity of BK  $\alpha$  K361N KI mice to escalate  
389 their alcohol consumption could be related to a differential sensitivity to some of the acute  
390 effects of alcohol. We first verified that there was no effect of genotype on the clearance rate of  
391 ethanol (effect of time:  $F_{2,16}=359.6$ ,  $p<0.0001$ ; effect of genotype:  $F_{2,8}=0.01$ ,  $p=0.99$ ; time x  
392 genotype interaction:  $F_{4,16}=0.2$ ,  $p=0.91$ , **Fig. 4A**). In the rotarod assay, WT, Het, and KI mice  
393 were similarly sensitive to the loss of motor coordination induced by 1.5 g/kg ethanol; there was  
394 no effect of genotype on ataxia duration ( $F_{2,26}=1.0$ ,  $p=0.37$ , **Fig. 4B**) and on BECs measured at  
395 recovery ( $F_{2,26}=2.0$ ,  $p=0.16$ , **Fig. 4C**). Likewise, WT, Het and KI mice exhibited similar durations  
396 of loss-of-righting-reflex following administration of 3.5 g/kg ethanol ( $F_{2,26}=0.5$ ,  $p=0.95$ , **Fig. 4D**)  
397 and similar BECs at recovery ( $H_{2,26}=4.1$ ,  $p=0.13$ , **Fig. 4E**). The amplitude of hypothermia was  
398 also identical across genotypes (effect of time:  $F_{2,52}=239.6$ ,  $p<0.0001$ ; effect of genotype:  
399  $F_{2,26}=0.4$ ,  $p=0.66$ ; time x genotype interaction:  $F_{4,52}=0.5$ ,  $p=0.71$ , **Fig. 4F**). Ethanol exerted a  
400 similar analgesic effects in WT, Het and KI mice at 1.5-2.5 g/kg doses (effect of dose:  
401  $F_{3,60}=61.0$ ,  $p<0.0001$ ; effect of genotype:  $F_{2,20}=2.0$ ,  $p=0.16$ ; dose x genotype interaction:  
402  $F_{6,60}=0.6$ ,  $p=0.73$ , **Fig. 4G**). Finally, the rewarding effect of 2 g/kg ethanol was equivalent in WT  
403 and KI mice, as measured by conditioned place preference (effect of conditioning:  $F_{1,24}=25.6$ ,  
404  $p<0.0001$ ; effect of genotype:  $F_{1,24}=0.6$ ,  $p=0.43$ ; conditioning x genotype interaction:  $F_{1,24}=0.04$ ,  
405  $p=0.85$ , **Fig. 4H**). Altogether, the BK  $\alpha$  K361N mutation had no influence on the sensitivity of  
406 mice to multiple behavioral and physiological acute effects of moderate and high doses of  
407 ethanol.

408

409

410 ***Ethanol's action at BK channels does not mediate the effect of chronic alcohol exposure***  
411 ***on metabolism, food intake, and locomotor activity***

412 We then tested whether, in addition to their resistance to the motivational effect of CIE on  
413 alcohol drinking, KI mice might also be spared from physiological changes relevant to AUD,  
414 such as metabolic [35] and sleep [36] disturbances. EchoMRI analysis indicated that CIE  
415 significantly altered body composition (**Fig. 5A**), reducing fat content ( $F_{1,10}=9.8$ ,  $p=0.011$ ) while  
416 increasing lean content ( $F_{1,10}=10.6$ ,  $p=0.0086$ ), in the absence of body weight change  
417 ( $F_{1,10}=0.001$ ,  $p=0.98$ , **Fig. 5B**). Metabolic monitoring also revealed increases in dark-phase food  
418 intake ( $F_{1,10}=7.3$ ,  $p=0.023$ , **Fig. 5C**) and dark-phase RER ( $F_{1,10}=15.7$ ,  $p=0.0027$ , **Fig. 5D**) in CIE-  
419 withdrawn mice. The K361N mutation did not influence any of these outcomes ( $F$ 's $<1.0$ ,  
420  $p$ 's $>0.34$  for main effect of genotype and genotype x vapor interaction). Furthermore, neither  
421 genotype nor CIE affected sleep measures (**Fig. 5E-F, Table 1**).

422 Finally, given the role of BK channels in regulating neuronal excitability in the suprachiasmatic  
423 nucleus (the primary circadian pacemaker in mammals) [37, 38] and the desynchronization of  
424 biological rhythms observed in AUD [39, 40], we sought to determine whether the action of  
425 ethanol on BK channels could be responsible for a disruption of circadian rhythmicity in CIE-  
426 exposed mice. Under a standard light-dark cycle, the ambulation of CIE-exposed mice was  
427 significantly reduced up to withdrawal day 8 (vapor x time interaction:  $F_{13,156}=10.3$ ,  $p<0.0001$ ,  
428 see **Fig. 6A** for significance of vapor effect at individual timepoints). There was no significant  
429 influence of genotype on ambulation nor on the depressant effect of CIE withdrawal (genotype  
430 effect:  $F_{1,12}=0.5$ ,  $p=0.49$ ; genotype x vapor interaction:  $F_{1,12}=0.08$ ,  $p=0.78$ ). To test the function  
431 of the intrinsic pacemaker, mice were then switched to constant darkness for 10 days and chi-  
432 square periodogram analysis was used to determine the period length and relative power of the  
433 dominant circadian component of ambulation counts (**Fig. 6B-D**). Two-way ANOVA revealed a  
434 significant interaction between vapor and genotype on period length ( $F_{1,12}=6.5$ ,  $p=0.025$ ), but

435 none of the pairwise comparisons reached significance. Neither the K361N mutation nor alcohol  
436 withdrawal significantly affected the relative power (genotype effect:  $F_{1,12}=2.5$ ,  $p=0.14$ ; vapor  
437 effect:  $F_{1,12}=2.2$ ,  $p=0.17$ ; genotype x vapor interaction:  $F_{1,12}=0.60$ ,  $p=0.45$ ).

438 In conclusion, the lack of voluntary alcohol intake escalation observed in BK  $\alpha$  K361N KI mice  
439 after 4 weeks of CIE exposure is not due to a differential sensitivity to the metabolic and  
440 locomotor effects of CIE withdrawal.

441

## 442 **Discussion**

443 Our data demonstrate that preventing ethanol from interacting with BK pore-forming subunit  
444 impedes the escalation of voluntary alcohol drinking in mice exposed to CIE, without altering the  
445 initiation or maintenance of alcohol drinking in control mice. Surprisingly, this manipulation did  
446 not affect the response of mice to acute ethanol or withdrawal from CIE, as evaluated in multiple  
447 behavioral and physiological assays. We also did not observe a consistent effect of BK channel  
448 pharmacological modulators administered acutely at non-tremorgenic doses on ethanol intake.  
449 Altogether, these findings support a critical role of ethanol's action at BK channels in the  
450 induction of neuroadaptations driving adverse motivational consequences of chronic alcohol  
451 exposure in mammals, which has relevance for AUD in humans.

452 The major behavioral disturbances elicited by the blockade of BK channels have historically  
453 been a hurdle to analyze the behavioral relevance of ethanol's action at this target. This  
454 limitation is illustrated by the results of our pharmacological experiments, whereby the dose-  
455 dependent effects of penitrem A on ethanol intake were impossible to disentangle from tremor  
456 induction. Paxilline injected at doses at least ten times lower than doses typically used to induce  
457 tremors (6-8 mg/kg, [33, 41]) did not cause overt behavioral abnormalities and marginally  
458 increased ethanol intake. An even lower dose of paxilline had been previously shown to reverse

459 picrotoxin- and pentylenetetrazole-induced seizures in the absence of tremors [21], which  
460 suggest that the doses we used were high enough to significantly reach and block BK channels  
461 in the mouse brain. On the other hand, BK channel activation by BMS-204352, at a dose known  
462 to acutely reverse the sensory hypersensitivity and social interaction deficits of *Fmr1* KO mice  
463 [22, 23], had no effect on ethanol intake. In our earlier work in BK  $\beta$ 1 and BK  $\beta$ 4 KO mice,  
464 genotypic differences in ethanol intake only emerged after CIE exposure [13], suggesting that  
465 CIE-exposed mice may be more sensitive to BK channel modulation. However, the effects of  
466 penitrem A, paxilline, and BMS-204352 were qualitatively similar in Air- and CIE-exposed mice.  
467 In conclusion, aside from tremors, acute pharmacological modulation of BK channels does not  
468 interfere with alcohol drinking, which suggests that ethanol's interaction with BK channels is  
469 unlikely to mediate the sensory, interoceptive, and reinforcing properties of this molecule.

470 To overcome the limitations of BK channel pharmacological modulation, we turned to a genetic  
471 approach capitalizing on our current understanding of the structural determinants of ethanol's  
472 action of BK channels, with K361 playing a key role as hydrogen bond donor in ethanol  
473 recognition by the BK  $\alpha$  cytoplasmic tail domain and the ensuing increase in channel open  
474 probability [15]. Importantly, while the K361N substitution confers refractoriness to 100 mM  
475 ethanol, it does not alter basal steady-state activity of BK channels, nor their sensitivity to the  
476 BK channel primary endogenous activators: voltage and intracellular calcium [15]. This  
477 selectivity is supported by our observation that K361N KI mice do not display reduced body  
478 weights or motor learning deficits, as reduced BK channel function would be expected to  
479 partially replicate the previously described phenotypes of BK  $\alpha$  KO mice [34].

480 The K361N substitution did not alter levels of alcohol intake during acquisition, nor during  
481 maintenance in Air-exposed mice. This finding is consistent with our earlier work in BK  $\beta$ 1 and  
482 BK  $\beta$ 4 KO mice, which did not differ from their WT counterparts in several paradigms of  
483 voluntary alcohol drinking unless they were also exposed to CIE [13]. Our data therefore

484 demonstrate that ethanol's action at BK channels is not necessary for alcohol to exert positive  
485 reinforcing effects. On the other hand, alcohol intake escalation induced by CIE exposure was  
486 blunted in K361N KI mice, indicating that ethanol's action at BK channels does contribute to  
487 increasing the motivation to self-administer alcohol in mice that undergo repeated cycles of  
488 alcohol intoxication and withdrawal. This finding is in accordance with the blunted escalation  
489 displayed by BK  $\beta 4$  KO mice, in which ethanol's action at neuronal BK channel undergoes rapid  
490 desensitization, as well as with the accelerated escalation displayed by BK  $\beta 1$  KO mice, in  
491 which ethanol-induced potentiation of BK-mediated currents is expected to be enhanced [12,  
492 13, 42]. Altogether, these data indicate that the action of ethanol on BK channels during CIE  
493 promotes alcohol drinking escalation. Accordingly, we propose that molecular adaptations  
494 resulting from chronic activation of BK channels by ethanol facilitate the progression to  
495 dependence. Future studies will determine the nature of these molecular adaptations. Based on  
496 the network of molecules known to physically interact with BK channels, a plethora of proteins,  
497 including calcium channels and cytoskeletal elements, may be involved [43]. Furthermore, given  
498 the ability of nuclear BK channels to influence nuclear calcium signaling, cAMP response  
499 element-binding protein-dependent transcriptional activity may also be recruited [44, 45].

500 A low level of response to alcohol represents a strong risk factor for an individual's propensity to  
501 develop an AUD [46]. We therefore hypothesized that the blunted escalation of K361N KI mice  
502 might be linked to a reduced sensitivity to alcohol's acute behavioral and physiological effects.  
503 However, we did not detect any effect of the K361N mutation, in the heterozygous or  
504 homozygous state, on the responses to low (ataxia), moderate (analgesia, reward), or high  
505 (sedation, hypothermia) doses of ethanol. Our data therefore indicate that ethanol's action at BK  
506 channels does not mediate alcohol intoxication in mice and that reduced sensitivity does not  
507 explain the reduced propensity of K361N mice to escalate their voluntary alcohol intake upon  
508 CIE exposure.

509 This finding highlights a major species divergence with respect to the role of BK channels in the  
510 behavioral effects of acute alcohol exposure. Most notably, mutating *C. elegans* SLO-1 (BK  
511 channel ortholog) residue T381 (equivalent to human BK channel T352) into an isoleucine  
512 abolishes ethanol-induced activation of the channel and confers resistance to behavioral signs  
513 of intoxication, i.e. egg laying inhibition and reduced locomotion [6]. This indicates that, in  
514 contrast to mice, BK channel *is* a critical mediator of alcohol intoxication in worms. However, BK  
515 channels were already known to play a drastically different role in flies. In this organism,  
516 increased expression of the *slo* gene, which encodes *D. melanogaster* BK channel pore-forming  
517 subunit, represents a counter-adaptation responsible for the development of tolerance to  
518 sedation, as well as withdrawal-associated hyperexcitability [8-11]. Such a role may also be at  
519 play in mammals.

520 We hypothesized that, aside from alcohol drinking escalation, ethanol's action at BK channels  
521 may mediate other physiological consequences of CIE exposure. We found that 4 weeks of CIE  
522 significantly altered the body composition of mice, reducing fat content and increasing lean  
523 content without affecting their total body mass. This observation is consistent with reports of  
524 reduced body fat in chronic alcoholics, in the absence of body weight change and in proportion  
525 to the level of alcohol consumption [47-50]. Studies in mice chronically fed an alcohol liquid diet  
526 have indicated that chronic alcohol reduces white, rather than brown, adipose tissue and that  
527 such lipolysis is associated with hepatic steatosis, i.e. ectopic deposition of fat in the liver [see  
528 35 for review]. Interestingly, CIE-exposed rats and mice do not show evidence of hepatic  
529 steatosis [51, 52]. The CIE procedure may therefore induce changes in lipid metabolism that  
530 reflect an early stage of the development of alcohol liver disease. Multiple molecular  
531 mechanisms have been proposed to underlie alcohol-induced lipolysis [reviewed in 35]; our data  
532 indicate that chronic activation of BK channels by ethanol is not implicated.

533 The leaner phenotype of CIE-exposed mice was associated with a significant increase in food  
534 intake during the first week of withdrawal, which may reflect a homeostatic adaptation to the  
535 loss of body fat. In humans, chronic alcohol abuse increases daily caloric intake, yet alcohol  
536 represents a substantial fraction of this intake, such that energy intake provided only by food  
537 ingestion is typically lower than in healthy counterparts [47, 48, 53]. In one study, 14 days of  
538 abstinence normalized the nutritional status of the alcoholic subjects, but it is not known whether  
539 a compensatory increase in food intake may have occurred during their first week of abstinence  
540 [53]. Withdrawal from CIE was also associated with a robust increase in RER, reflecting  
541 preferential utilization of carbohydrates as a fuel. The dark-phase RER of CIE-exposed mice  
542 even approached the maximal theoretical value of 1 (i.e., carbohydrates used as sole  
543 substrate). This RER pattern may result from deficient lipid storage, as reflected by reduced  
544 body fat, and a corresponding inability to sustain normal levels of fatty acid oxidation. However,  
545 this observation contrasts with the lower respiratory quotient, higher lipid oxidation, and reduced  
546 carbohydrate oxidation reported in human alcoholics, which all normalize after three months of  
547 abstinence [47, 48, 53, 54]. To the best of our knowledge, the possibility that a rebound  
548 increase in respiratory quotient may occur during the first week of abstinence has not been  
549 explored in humans. In any case, the phenotype of KI mice indicates that the action of ethanol  
550 at BK channels is not responsible for the nutritional and metabolic changes associated with  
551 early withdrawal from chronic alcohol exposure.

552 Sleep disturbances are a hallmark of AUD disorders; insomnia is commonly experienced during  
553 abstinence and may contribute to relapse [36]. In mice, 4 weeks of CIE exposure combined with  
554 2BC reduces the quantity and quality of slow-wave sleep 4 days into withdrawal [55]. In the  
555 present study, CIE did not affect sleep parameters recorded in the CLAMS chambers (bouts of  
556 inactivity > 40 s). It is possible that this methodology is not sensitive enough or that concomitant  
557 2BC experience is critical to detect sleep alteration. AUD have also been associated with a

558 dysregulation of the circadian rhythm [40]. While CIE strongly reduced locomotor activity across  
559 both light and dark phases up to 8 days into withdrawal, it did not significantly affect free-running  
560 circadian period and amplitude. These observations extend similar findings from an earlier study  
561 in which C57BL/6J males had been exposed to 3 weeks of CIE [56]. These negative results  
562 precluded us from testing the role of BK channels in the effects of chronic alcohol exposure on  
563 sleep and circadian rhythm.

564 In conclusion, our data show that, in the mouse, ethanol's interaction with BK channels  
565 facilitates the escalation of voluntary alcohol intake produced by repeated cycles of alcohol  
566 intoxication and withdrawal. This role is dissociated from the metabolic and activity changes  
567 produced by chronic alcohol exposure and may instead contribute to increasing the motivational  
568 drive to consume alcohol. Furthermore, we demonstrate that BK channels do not mediate  
569 several acute behavioral effects of ethanol in mice, which contrast with previous findings  
570 obtained in *C. elegans*. By evolutionary extension, we propose that, in humans, BK channels  
571 may represent a valid target to counter allostatic adaptations associated with chronic alcohol  
572 exposure, rather than to block ethanol's acute effects. Future studies will aim to identify the  
573 brain regions and cellular populations in which BK channels may be gating molecular changes  
574 driving the transition to alcohol dependence.



575 **Acknowledgments**

576 We thank Dr. Elizabeth Thomas for lending us her rotarod apparatus, Dr. Mark Azar for his help  
577 with the tremor experiment, Brandon Hedges for his assistance with the paxilline experiment,  
578 and Carolyn Ferguson for expert technical assistance. We are also grateful for the support of  
579 TSRI's Animal Models Core, the Integrative Neuroscience Initiative on Alcoholism-  
580 Neuroimmune and the TSRI Alcohol Research Center Animal Models Core, which conducted  
581 blood ethanol concentration analysis for this study. This work was supported by the following  
582 grants from the National Institutes of Health: AA020913 (CC), AA006420 (CC, AJR), AA026685  
583 (CC), AA027636 (CC), AA027372 (CC), AA020889 (GEH), AA10422 (GEH).

584 **Author contributions**

585 AO, MK, AJR, and CC performed behavioral experiments. AO, PB, AJR, and CC analyzed data.

586 CC and AJR designed experiments. GEH generated the knockin mice. AMD contributed to

587 conceptualization. CC conceived the study, acquired funds, and wrote the manuscript.

588 **Disclosure**

589 The authors declare no conflict of interest.

590 **References**

- 591 1. Dopico, A.M., Lemos, J.R., and Treistman, S.N. Ethanol increases the activity of large  
592 conductance, Ca(2+)-activated K<sup>+</sup> channels in isolated neurohypophysial terminals. *Mol*  
593 *Pharmacol*, 1996. **49**(1): p. 40-8.
- 594 2. Martin, G., et al. Somatic localization of a specific large-conductance calcium-activated  
595 potassium channel subtype controls compartmentalized ethanol sensitivity in the nucleus  
596 accumbens. *J Neurosci*, 2004. **24**(29): p. 6563-72.
- 597 3. Abrahao, K.P., Chancey, J.H., Chan, C.S., and Lovinger, D.M. Ethanol-Sensitive  
598 Pacemaker Neurons in the Mouse External Globus Pallidus.  
599 *Neuropsychopharmacology*, 2017. **42**(5): p. 1070-1081.
- 600 4. Dopico, A.M., Bukiya, A.N., Kuntamallappanavar, G., and Liu, J. Modulation of BK  
601 Channels by Ethanol. *Int Rev Neurobiol*, 2016. **128**: p. 239-79.
- 602 5. Davies, A.G., et al. A central role of the BK potassium channel in behavioral responses  
603 to ethanol in *C. elegans*. *Cell*, 2003. **115**(6): p. 655-66.
- 604 6. Davis, S.J., Scott, L.L., Hu, K., and Pierce-Shimomura, J.T. Conserved single residue in  
605 the BK potassium channel required for activation by alcohol and intoxication in *C.*  
606 *elegans*. *J Neurosci*, 2014. **34**(29): p. 9562-73.
- 607 7. Cowmeadow, R.B., Krishnan, H.R., and Atkinson, N.S. The slowpoke gene is necessary  
608 for rapid ethanol tolerance in *Drosophila*. *Alcohol Clin Exp Res*, 2005. **29**(10): p. 1777-  
609 86.
- 610 8. Cowmeadow, R.B., et al. Ethanol tolerance caused by slowpoke induction in *Drosophila*.  
611 *Alcohol Clin Exp Res*, 2006. **30**(5): p. 745-53.
- 612 9. Ghezzi, A., Krishnan, H.R., and Atkinson, N.S. Susceptibility to ethanol withdrawal  
613 seizures is produced by BK channel gene expression. *Addict Biol*, 2014. **19**(3): p. 332-7.

- 614 10. Ghezzi, A., Pohl, J.B., Wang, Y., and Atkinson, N.S. BK channels play a counter-  
615 adaptive role in drug tolerance and dependence. *Proc Natl Acad Sci U S A*, 2010.  
616 **107**(37): p. 16360-5.
- 617 11. Ghezzi, A., Al-Hasan, Y.M., Larios, L.E., Bohm, R.A., and Atkinson, N.S. slo K(+)  
618 channel gene regulation mediates rapid drug tolerance. *Proc Natl Acad Sci U S A*, 2004.  
619 **101**(49): p. 17276-81.
- 620 12. Martin, G.E., et al. Identification of a BK channel auxiliary protein controlling molecular  
621 and behavioral tolerance to alcohol. *Proc Natl Acad Sci U S A*, 2008. **105**(45): p. 17543-  
622 8.
- 623 13. Kreifeldt, M., Le, D., Treistman, S.N., Koob, G.F., and Contet, C. BK channel beta1 and  
624 beta4 auxiliary subunits exert opposite influences on escalated ethanol drinking in  
625 dependent mice. *Front Integr Neurosci*, 2013. **7**: p. 105.
- 626 14. Kreifeldt, M., Cates-Gatto, C., Roberts, A.J., and Contet, C. BK Channel beta1 Subunit  
627 Contributes to Behavioral Adaptations Elicited by Chronic Intermittent Ethanol Exposure.  
628 *Alcohol Clin Exp Res*, 2015. **39**(12): p. 2394-402.
- 629 15. Bukiya, A.N., et al. An alcohol-sensing site in the calcium- and voltage-gated, large  
630 conductance potassium (BK) channel. *Proc Natl Acad Sci U S A*, 2014. **111**(25): p.  
631 9313-8.
- 632 16. Blednov, Y.A., et al. Mutation of the inhibitory ethanol site in GABAA rho1 receptors  
633 promotes tolerance to ethanol-induced motor incoordination. *Neuropharmacology*, 2017.  
634 **123**: p. 201-209.
- 635 17. Hsu, P.D., et al. DNA targeting specificity of RNA-guided Cas9 nucleases. *Nat*  
636 *Biotechnol*, 2013. **31**(9): p. 827-32.
- 637 18. Yang, H., Wang, H., and Jaenisch, R. Generating genetically modified mice using  
638 CRISPR/Cas-mediated genome engineering. *Nat Protoc*, 2014. **9**(8): p. 1956-68.

- 639 19. Guo, D., et al. Online High-throughput Mutagenesis Designer Using Scoring Matrix of  
640 Sequence-specific Endonucleases. *J Integr Bioinform*, 2015. **12**(1): p. 35-48.
- 641 20. Gallagher, R.T. and Hawkes, A.D. The potent tremorgenic neurotoxins lolitrem B and  
642 aflatrem: a comparison of the tremor response in mice. *Experientia*, 1986. **42**(7): p. 823-  
643 5.
- 644 21. Sheehan, J.J., Benedetti, B.L., and Barth, A.L. Anticonvulsant effects of the BK-channel  
645 antagonist paxilline. *Epilepsia*, 2009. **50**(4): p. 711-20.
- 646 22. Zhang, Y., et al. Dendritic channelopathies contribute to neocortical and sensory  
647 hyperexcitability in *Fmr1*(-/-) mice. *Nat Neurosci*, 2014. **17**(12): p. 1701-9.
- 648 23. Hebert, B., et al. Rescue of fragile X syndrome phenotypes in *Fmr1* KO mice by a BKCa  
649 channel opener molecule. *Orphanet J Rare Dis*, 2014. **9**: p. 124.
- 650 24. Becker, H.C. and Lopez, M.F. Increased ethanol drinking after repeated chronic ethanol  
651 exposure and withdrawal experience in C57BL/6 mice. *Alcohol Clin Exp Res*, 2004.  
652 **28**(12): p. 1829-38.
- 653 25. Elhabazi, K., Ayachi, S., Ilien, B., and Simonin, F. Assessment of morphine-induced  
654 hyperalgesia and analgesic tolerance in mice using thermal and mechanical nociceptive  
655 modalities. *J Vis Exp*, 2014(89): p. e51264.
- 656 26. McLean, J.A. and Tobin, G. Animal and Human Calorimetry. 1987, Cambridge:  
657 Cambridge University Press. 338.
- 658 27. Pack, A.I., et al. Novel method for high-throughput phenotyping of sleep in mice. *Physiol*  
659 *Genomics*, 2007. **28**(2): p. 232-8.
- 660 28. Enright, J.T. The search for rhythmicity in biological time-series. *J Theor Biol*, 1965. **8**(3):  
661 p. 426-68.
- 662 29. Refinetti, R. Laboratory instrumentation and computing: comparison of six methods for  
663 the determination of the period of circadian rhythms. *Physiol Behav*, 1993. **54**(5): p. 869-  
664 75.

- 665 30. Knaus, H.G., et al. Tremorgenic indole alkaloids potently inhibit smooth muscle high-  
666 conductance calcium-activated potassium channels. *Biochemistry*, 1994. **33**(19): p.  
667 5819-28.
- 668 31. Asano, S., et al. Penitrem A as a tool for understanding the role of large conductance  
669 Ca(2+)/voltage-sensitive K(+) channels in vascular function. *J Pharmacol Exp Ther*,  
670 2012. **342**(2): p. 453-60.
- 671 32. Jortner, B.S., Ehrich, M., Katherman, A.E., Huckle, W.R., and Carter, M.E. Effects of  
672 prolonged tremor due to penitrem A in mice. *Drug Chem Toxicol*, 1986. **9**(2): p. 101-16.
- 673 33. Imlach, W.L., et al. The molecular mechanism of "ryegrass staggers," a neurological  
674 disorder of K<sup>+</sup> channels. *J Pharmacol Exp Ther*, 2008. **327**(3): p. 657-64.
- 675 34. Sausbier, M., et al. Cerebellar ataxia and Purkinje cell dysfunction caused by Ca<sup>2+</sup>-  
676 activated K<sup>+</sup> channel deficiency. *Proc Natl Acad Sci U S A*, 2004. **101**(25): p. 9474-8.
- 677 35. Steiner, J.L. and Lang, C.H. Alcohol, Adipose Tissue and Lipid Dysregulation.  
678 *Biomolecules*, 2017. **7**(1).
- 679 36. Chakravorty, S., Chaudhary, N.S., and Brower, K.J. Alcohol Dependence and Its  
680 Relationship With Insomnia and Other Sleep Disorders. *Alcohol Clin Exp Res*, 2016.  
681 **40**(11): p. 2271-2282.
- 682 37. Meredith, A.L., et al. BK calcium-activated potassium channels regulate circadian  
683 behavioral rhythms and pacemaker output. *Nat Neurosci*, 2006. **9**(8): p. 1041-9.
- 684 38. Harvey, J.R.M., Plante, A.E., and Meredith, A.L. Ion Channels Controlling Circadian  
685 Rhythms in Suprachiasmatic Nucleus Excitability. *Physiol Rev*, 2020. **100**(4): p. 1415-  
686 1454.
- 687 39. Lindberg, D., Andres-Beck, L., Jia, Y.F., Kang, S., and Choi, D.S. Purinergic Signaling in  
688 Neuron-Astrocyte Interactions, Circadian Rhythms, and Alcohol Use Disorder. *Front*  
689 *Physiol*, 2018. **9**: p. 9.

- 690 40. Meyrel, M., Rolland, B., and Geoffroy, P.A. Alterations in circadian rhythms following  
691 alcohol use: A systematic review. *Prog Neuropsychopharmacol Biol Psychiatry*, 2020.  
692 **99**: p. 109831.
- 693 41. Combs, M.D., Hamlin, A., and Quinn, J.C. A single exposure to the tremorgenic  
694 mycotoxin lolitrem B inhibits voluntary motor activity and spatial orientation but not  
695 spatial learning or memory in mice. *Toxicol*, 2019. **168**: p. 58-66.
- 696 42. Kuntamallappanavar, G. and Dopico, A.M. Alcohol modulation of BK channel gating  
697 depends on beta subunit composition. *J Gen Physiol*, 2016. **148**(5): p. 419-440.
- 698 43. Kim, H. and Oh, K.H. Protein Network Interacting with BK Channels. *Int Rev Neurobiol*,  
699 2016. **128**: p. 127-61.
- 700 44. Bengtson, C.P. and Bading, H. Nuclear calcium signaling. *Adv Exp Med Biol*, 2012. **970**:  
701 p. 377-405.
- 702 45. Li, B., et al. Nuclear BK channels regulate gene expression via the control of nuclear  
703 calcium signaling. *Nat Neurosci*, 2014. **17**(8): p. 1055-63.
- 704 46. Schuckit, M.A. Low level of response to alcohol as a predictor of future alcoholism. *Am J*  
705 *Psychiatry*, 1994. **151**(2): p. 184-9.
- 706 47. Addolorato, G., Capristo, E., Greco, A.V., Stefanini, G.F., and Gasbarrini, G. Energy  
707 expenditure, substrate oxidation, and body composition in subjects with chronic  
708 alcoholism: new findings from metabolic assessment. *Alcohol Clin Exp Res*, 1997. **21**(6):  
709 p. 962-7.
- 710 48. Addolorato, G., Capristo, E., Greco, A.V., Stefanini, G.F., and Gasbarrini, G. Influence of  
711 chronic alcohol abuse on body weight and energy metabolism: is excess ethanol  
712 consumption a risk factor for obesity or malnutrition? *J Intern Med*, 1998. **244**(5): p. 387-  
713 95.



- 714 49. Addolorato, G., et al. Body composition changes induced by chronic ethanol abuse:  
715 evaluation by dual energy X-ray absorptiometry. *Am J Gastroenterol*, 2000. **95**(9): p.  
716 2323-7.
- 717 50. Liangpunsakul, S., Crabb, D.W., and Qi, R. Relationship among alcohol intake, body fat,  
718 and physical activity: a population-based study. *Ann Epidemiol*, 2010. **20**(9): p. 670-5.
- 719 51. Mouton, A.J., et al. Alcohol Vapor Inhalation as a Model of Alcohol-Induced Organ  
720 Disease. *Alcohol Clin Exp Res*, 2016. **40**(8): p. 1671-8.
- 721 52. Xu, J., et al. Blockade of IL-17 signaling reverses alcohol-induced liver injury and  
722 excessive alcohol drinking in mice. *JCI Insight*, 2020. **5**(3).
- 723 53. Levine, J.A., Harris, M.M., and Morgan, M.Y. Energy expenditure in chronic alcohol  
724 abuse. *Eur J Clin Invest*, 2000. **30**(9): p. 779-86.
- 725 54. Addolorato, G., et al. Three months of abstinence from alcohol normalizes energy  
726 expenditure and substrate oxidation in alcoholics: a longitudinal study. *Am J*  
727 *Gastroenterol*, 1998. **93**(12): p. 2476-81.
- 728 55. Huitron-Resendiz, S., et al. Effects of Withdrawal from Chronic Intermittent Ethanol  
729 Exposure on Sleep Characteristics of Female and Male Mice. *Alcohol Clin Exp Res*,  
730 2018. **42**(3): p. 540-550.
- 731 56. Logan, R.W., McCulley, W.D., 3rd, Seggio, J.A., and Rosenwasser, A.M. Effects of  
732 withdrawal from chronic intermittent ethanol vapor on the level and circadian periodicity  
733 of running-wheel activity in C57BL/6J and C3H/HeJ mice. *Alcohol Clin Exp Res*, 2012.  
734 **36**(3): p. 467-76.

735

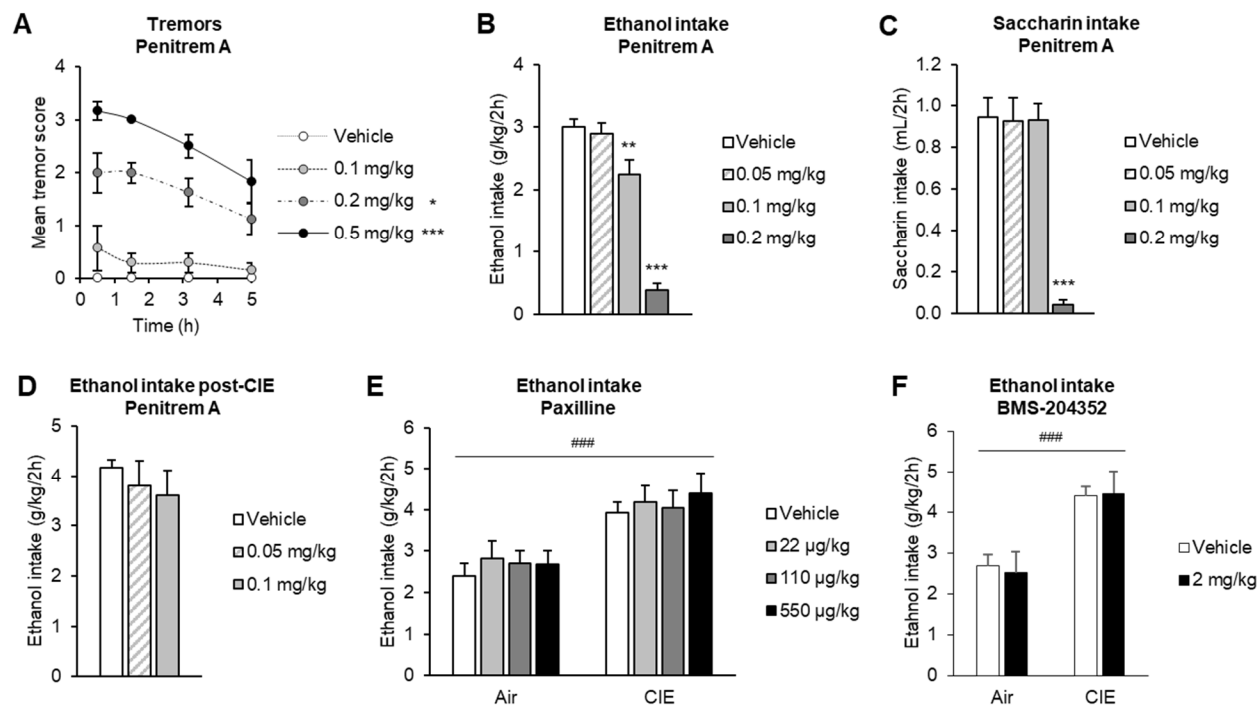

736

737 **Figure 1. Low-dose pharmacological inhibition or activation of BK channels does not**  
738 **consistently alter alcohol drinking. A.** Penitrem A, a BK channel blocker, induced tremors in  
739 a dose-dependent manner in alcohol-naïve C57BL/6J males (n=28, between-subject design). **B-**  
740 **F.** C57BL/6J male mice were given access to voluntary alcohol (**B, D-F**) or saccharin (**C**)  
741 consumption in 2-h two-bottle choice sessions. Some mice were exposed to chronic intermittent  
742 ethanol (CIE) vapor inhalation to induce dependence and increase voluntary ethanol intake,  
743 compared to mice inhaling air only (Air). **B-D.** Penitrem A reduced alcohol (**B**, n=20, within-  
744 subject design) and saccharin (**C**, n=20, within-subject design) intake at doses inducing tremors.  
745 CIE exposure did not sensitize mice to the effect of penitrem A (**D**, n=20, same mice as in **B**,  
746 within-subject design). **E.** Paxilline, a BK channel blocker, did not affect alcohol intake, across a  
747 range of non-tremorgenic doses and regardless of the dependence status of mice (n=18). **F.**  
748 BMS-204352, a BK channel opener, did not affect alcohol intake in Air or CIE mice (n=30).  
749 Significant difference with vehicle: \*, p<0.05; \*\*, p<0.01; \*\*\*, p<0.001. Significant main effect of  
750 CIE: ###, p<0.001. Data are shown as mean ± s.e.m.

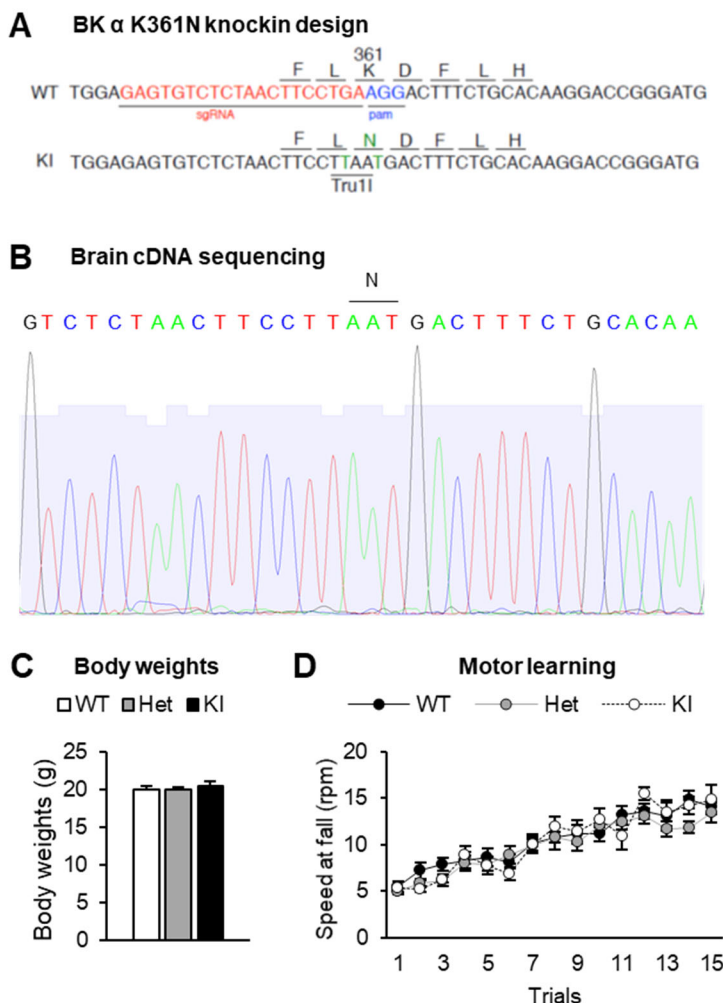

751

752 **Figure 2. Generation of BK  $\alpha$  K361N knockin (KI) mice.** **A.** Design of the CRISPR/Cas9

753 construct used to introduce the K361N mutation in C57BL/6J mice. The single guide RNA

754 (sgRNA) sequence is shown in red, the protospacer adjacent motif (PAM) is shown in blue, and

755 the two mutated nucleotides are shown in green. WT, wildtype allele; KI, knockin allele. **B.**

756 Verification of the mutated sequence in cDNA prepared from the brain of a K361N KI mouse.

757 The triplet encoding the K361N mutation is highlighted. **C.** Body weights measured in males at 6

758 weeks of age (WT, n=7; Het, n=12; KI, n=6). **D.** Motor coordination measured in the

759 accelerating rotarod assay in adult males (WT, n=10; Het, n=11; KI, n=8). There was no effect

760 of genotype on either measure. Data are shown as mean  $\pm$  s.e.m.

|                           |                           |                 |                           |                 |                           |                 |                           |                 |                           |
|---------------------------|---------------------------|-----------------|---------------------------|-----------------|---------------------------|-----------------|---------------------------|-----------------|---------------------------|
| 2BC – BL1<br>2 h x 5 days | 2BC – BL2<br>2 h x 5 days | CIE<br>4 cycles | 2BC – PV1<br>2 h x 5 days | CIE<br>4 cycles | 2BC – PV2<br>2 h x 5 days | CIE<br>4 cycles | 2BC – PV3<br>2 h x 5 days | CIE<br>4 cycles | 2BC – PV4<br>2 h x 5 days |
|---------------------------|---------------------------|-----------------|---------------------------|-----------------|---------------------------|-----------------|---------------------------|-----------------|---------------------------|

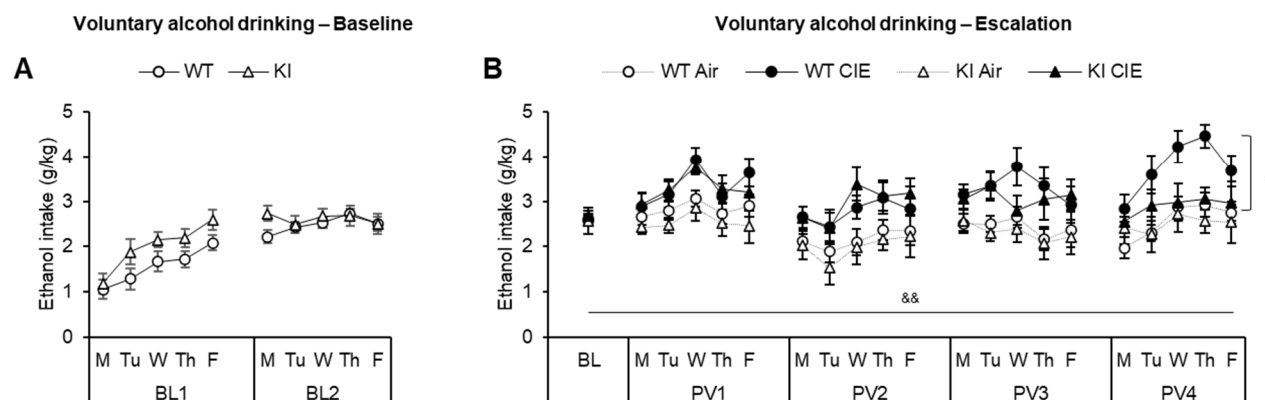

761

762 **Figure 3. The BK  $\alpha$  K361N mutation hinders alcohol drinking escalation in the CIE-2BC**

763 **model of dependence. A-B.** BK  $\alpha$  K361N WT (n=21) and KI (n=17) mice were given access to

764 voluntary alcohol consumption in 2-h two-bottle choice sessions prior to (A, and BL, baseline, in

765 B) and in-between weeks of chronic intermittent ethanol (CIE) vapor inhalation (B). Statistical

766 analysis was conducted on weekly averages. There was a significant week x vapor interaction

767 (&&,  $p < 0.01$ ). During PV4, CIE-exposed WT mice (n=10) consumed significantly more alcohol

768 than their Air-exposed counterparts (n=11,  $p = 0.010$ , #) and than CIE-exposed KI mice (n=9,

769  $p = 0.014$ , \*). In contrast, there was no difference between Air (n=8) and CIE-exposed KI mice

770 ( $p = 0.76$ ). Data are shown as mean  $\pm$  s.e.m.

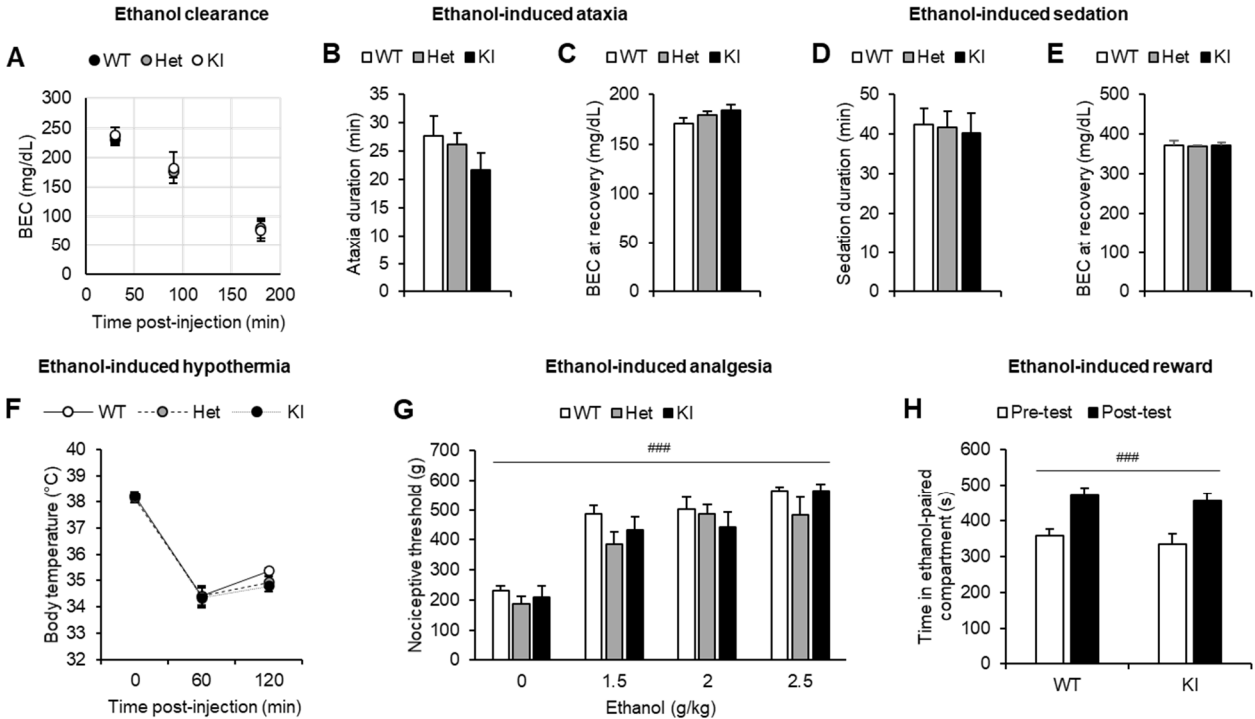

771

772 **Figure 4. The BK  $\alpha$  K361N mutation does not affect sensitivity to acute effects of alcohol**

773 Measures of alcohol metabolism and intoxication were obtained in BK  $\alpha$  K361N WT, Het and KI

774 mice acutely exposed to ethanol (i.p.). **A**. Blood ethanol concentration (BEC) clearance time-

775 course. **B-H**. Ethanol-induced ataxia (**B-C**, fixed-speed rotarod), sedation (**D-E**, loss of righting

776 reflex), hypothermia (**F**), analgesia (**G**, tail pressure test) and reward (**H**, conditioned place

777 preference). ###, effect of ethanol,  $p < 0.001$ . None of the measures was significantly affected by

778 genotype. Sample sizes were as follows: **A**: WT,  $n=3$ ; Het,  $n=4$ ; KI,  $n=4$ . **B-F**: WT,  $n=10$ ; Het,

779  $n=11$ ; KI,  $n=8$ . **G**: WT,  $n=7$ ; Het,  $n=9$ ; KI,  $n=7$ . **H**: WT,  $n=11$ ; KI,  $n=15$ . Data are shown as mean

780  $\pm$  s.e.m.

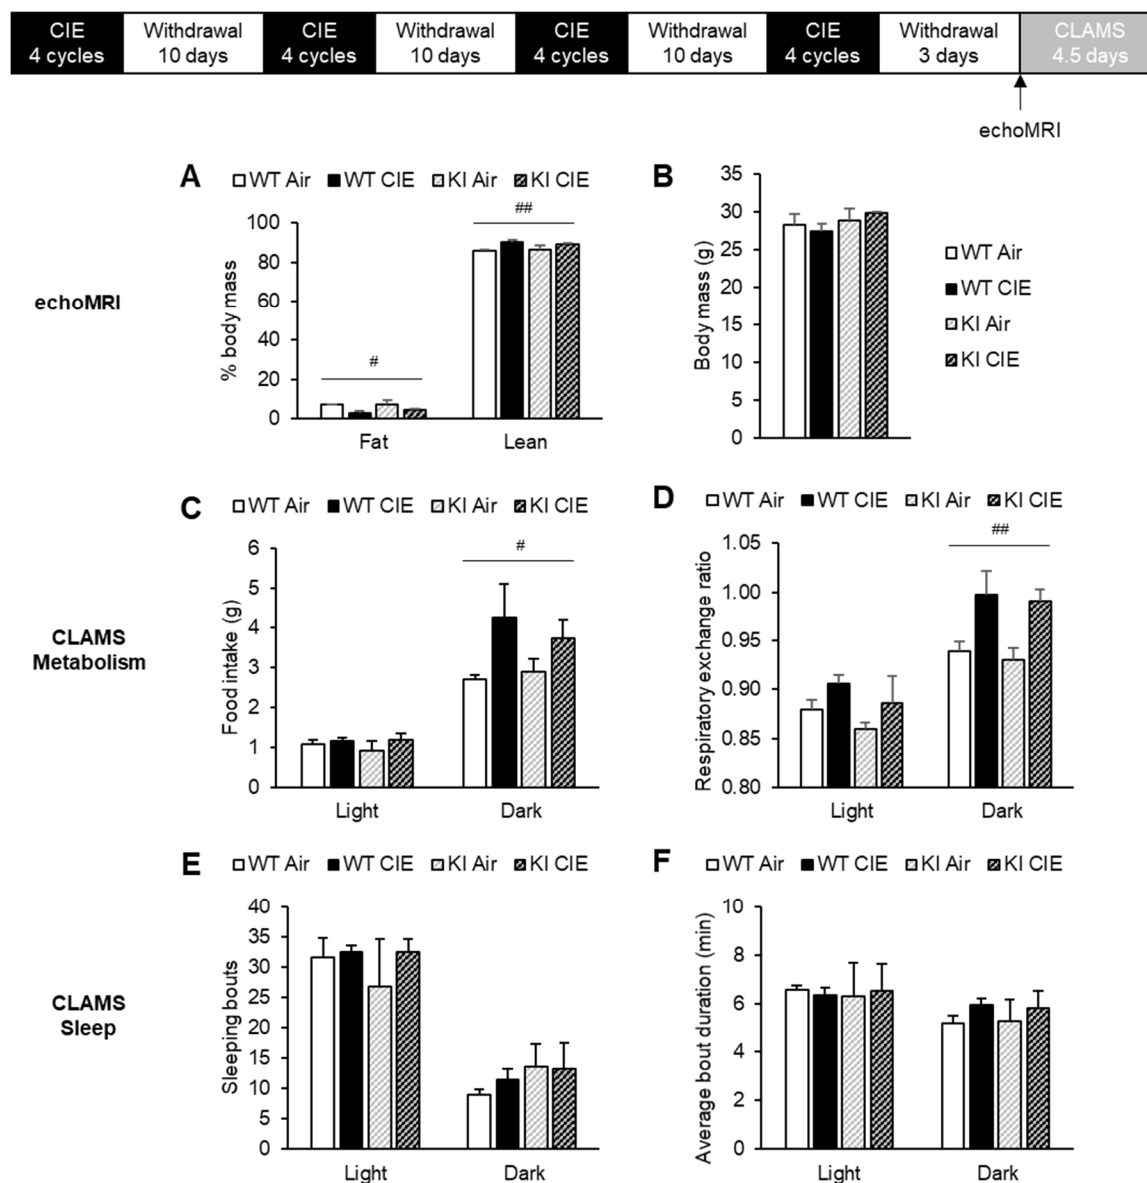

781

782 **Figure 5. The BK  $\alpha$  K361N mutation does not influence the metabolic effects of chronic**  
 783 **intermittent ethanol (CIE) exposure**

784 BK  $\alpha$  K361N WT (n=8) and KI (n=7) mice were exposed to air or chronic intermittent ethanol  
 785 (CIE) vapor inhalation. Body composition was determined 3 days into withdrawal (A-B). Food  
 786 intake (C), respiratory exchange ratio (D), sleep bout number (E) and duration (F) were then  
 787 recorded in metabolic chambers during 4.5 days. Main effect of vapor: #, p<0.05; ##, p<0.01.

788 None of the measures was significantly affected by genotype. Main effects of circadian phase  
 789 are not shown (see Table 1 for details). Data are shown as mean  $\pm$  s.e.m.

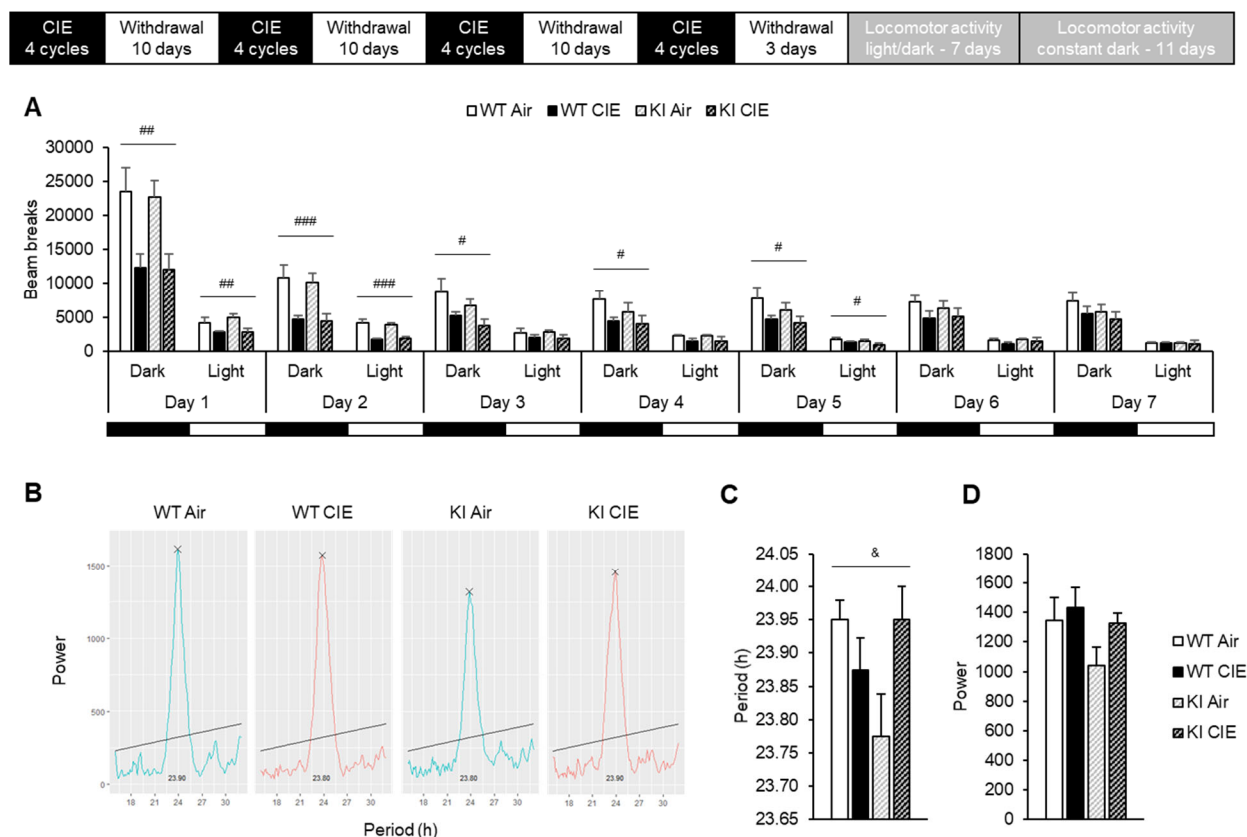

790

791 **Figure 6. The BK  $\alpha$  K361N mutation does not influence activity changes induced by**  
 792 **chronic intermittent ethanol (CIE) exposure**

793 BK  $\alpha$  K361N WT (n=8) and KI (n=8) mice were exposed to air or chronic intermittent ethanol  
 794 (CIE) vapor inhalation. Locomotor activity was recorded starting 3 days into withdrawal (**A**). CIE  
 795 significantly reduced ambulation up to withdrawal day 8 (#, p<0.05; ##, p<0.01; ###, p<0.001).

796 After 7 days, mice were switched to constant darkness and periodogram analysis

797 (representative plots shown in **B**) was used to determine the free-running circadian period

798 length (**C**) and relative power (**D**). There was a significant genotype x vapor interaction on the

799 period (&, p<0.05) but none of the pairwise comparisons reached significance. Data are shown

800 as mean  $\pm$  s.e.m.

|                                    | <b>Genotype</b>             | <b>Vapor</b>                | <b>Genotype x Vapor</b>     | <b>Phase</b>                  | <b>Phase x Genotype</b>     | <b>Phase x Vapor</b>        | <b>Phase x Genotype x Vapor</b> |
|------------------------------------|-----------------------------|-----------------------------|-----------------------------|-------------------------------|-----------------------------|-----------------------------|---------------------------------|
| <b>Food intake</b>                 | $F_{1,10}=0.25$<br>$p=0.63$ | $F_{1,10}=9.3$<br>$p=0.012$ | $F_{1,10}=0.37$<br>$p=0.56$ | $F_{1,10}=89.7$<br>$P<0.0001$ | $F_{1,10}=0.02$<br>$p=0.88$ | $F_{1,10}=4.4$<br>$p=0.063$ | $F_{1,10}=0.84$<br>$p=0.38$     |
| <b>Respiratory exchange ratio</b>  | $F_{1,10}=0.98$<br>$p=0.34$ | $F_{1,10}=9.4$<br>$p=0.012$ | $F_{1,10}<0.01$<br>$p=0.96$ | $F_{1,10}=234$<br>$P<0.0001$  | $F_{1,10}=1.4$<br>$p=0.26$  | $F_{1,10}=9.5$<br>$p=0.011$ | $F_{1,10}<0.01$<br>$p=0.93$     |
| <b>Sleeping bouts</b>              | $F_{1,11}=0.02$<br>$p=0.90$ | $F_{1,11}=0.4$<br>$p=0.54$  | $F_{1,11}=0.02$<br>$p=0.90$ | $F_{1,11}=81.1$<br>$P<0.0001$ | $F_{1,11}=1.8$<br>$p=0.20$  | $F_{1,11}=0.3$<br>$p=0.60$  | $F_{1,11}=0.8$<br>$p=0.39$      |
| <b>Average sleep bout duration</b> | $F_{1,11}<0.01$<br>$p=0.97$ | $F_{1,11}=0.2$<br>$p=0.66$  | $F_{1,11}<0.01$<br>$p=0.94$ | $F_{1,11}=17.9$<br>$P=0.0014$ | $F_{1,11}<0.01$<br>$p=0.97$ | $F_{1,11}=2.2$<br>$p=0.17$  | $F_{1,11}=0.7$<br>$p=0.41$      |

801

802 **Table 1.** RM-ANOVAs were conducted to analyze the influence of genotype and alcohol vapor  
803 exposure on metabolic and sleep parameters during the light and dark phases. Data were  
804 collected over 4 consecutive periods of 24 h, starting 3 days after the last vapor exposure.  
805 Corresponding data are plotted in Figure 5.
