1 **Ethanol's action at BK channels accelerates the transition from moderate to excessive**  
2 **alcohol consumption**

3

4 Agbonlahor Okhwarobo<sup>1</sup>, Max Kreifeldt<sup>1</sup>, Pushpita Bhattacharyya<sup>1</sup>, Alex M Dopico<sup>2</sup>, Amanda J  
5 Roberts<sup>3</sup>, Gregg E Homanics<sup>4</sup>, Candice Contet<sup>1\*</sup>

6

7 Affiliations:

8 <sup>1</sup> The Scripps Research Institute, Department of Molecular Medicine, La Jolla, CA

9 <sup>2</sup> University of Tennessee Health Science Center, Department of Pharmacology, Addiction  
10 Science, and Toxicology, Memphis, TN

11 <sup>3</sup> The Scripps Research Institute, Animals Models Core Facility, La Jolla, CA

12 <sup>4</sup> University of Pittsburgh, Department of Anesthesiology and Perioperative Medicine,  
13 Pittsburgh, PA

14

15 **\* Corresponding author**

16 Candice Contet

17 Address: The Scripps Research Institute, 10550 N Torrey Pines Road, SR-107, La Jolla, CA  
18 92037, USA

19 Phone: 858 784 7209

20 Email: [contet@scripps.edu](mailto:contet@scripps.edu)

21

22 **Short title:** BK channels in alcohol dependence

23

24 **Keywords:** *Kcnma1*, Slo1, Maxi-K, knockin, vapor, inhalation, dependence, intermittent,  
25 abstinence

26 **Abstract**

27 Large conductance potassium (BK) channels are among the most sensitive molecular targets of  
28 ethanol. Whether the action of ethanol at BK channels influences the motivation to drink alcohol  
29 remains to be determined. In the present study, we sought to investigate the behavioral  
30 relevance of this interaction by introducing in the mouse genome a point mutation (BK  $\alpha$  K361N)  
31 known to render BK channels insensitive to ethanol while preserving their physiological function.  
32 We demonstrate that preventing ethanol's interaction with BK channels at this site hinders the  
33 escalation of voluntary alcohol intake induced by repeated cycles of alcohol intoxication and  
34 withdrawal. In contrast, the mutation does not alter ethanol's acute behavioral effects, nor the  
35 metabolic and activity changes induced by chronic exposure to alcohol. Our findings point at BK  
36 channel ethanol-sensing capacity as a vulnerability mechanism in the transition from moderate  
37 alcohol consumption to pathological patterns of alcohol abuse.

## 38 **Introduction**

39 Calcium- and voltage-activated, large conductance potassium (BK) channels are one of the  
40 primary molecular targets of ethanol in the brain [1-3]. Depending on multiple molecular  
41 determinants (e.g., intracellular calcium concentration, alternative splicing, subunit composition,  
42 posttranslational modifications, lipid microenvironment), ethanol can either potentiate or reduce  
43 BK channel-mediated currents [reviewed in 4]. Whether the action of ethanol on mammalian BK  
44 channels mediates the behavioral effects of ethanol and influences the motivation to drink  
45 alcohol remains to be determined. Filling this gap of knowledge has critical implications for the  
46 understanding and treatment of alcohol use disorders (AUD) as it would support or put into  
47 question the potential of BK channels as a relevant therapeutic target in AUD.

48 Until now, the contribution of BK channels to the behavioral effects of ethanol has been studied  
49 by genetically manipulating the pore-forming  $\alpha$  subunit in worms and flies, and the auxiliary  $\beta$   
50 subunits in mice. Studies in invertebrates showed that BK  $\alpha$  mediates the intoxicating effects of  
51 ethanol in worms [5, 6] and rapid tolerance to ethanol-induced sedation and increased seizure  
52 susceptibility in flies [7-11]. In mice, deletion of BK  $\beta$ 4 promotes rapid tolerance to the locomotor  
53 depressant effect of ethanol [12] and attenuates ethanol drinking escalation in ethanol-  
54 dependent mice [13]. Conversely, deletion of BK  $\beta$ 1 accelerates drinking escalation in  
55 dependent mice [13] and reduces chronic tolerance to ethanol-induced sedation and  
56 hypothermia [14]. These findings suggest that BK auxiliary subunits play a role in the adaptive  
57 response to chronic ethanol exposure in mammals but fail to provide a direct insight into the role  
58 of ethanol's interaction with BK pore-forming subunit in alcohol-related behaviors.

59 In the present study, we sought to establish whether the action of ethanol at BK channels  
60 contributes to excessive alcohol drinking in a mouse model of alcohol dependence. We first  
61 show the limitations of currently available pharmacological modulators of BK channels to  
62 address this question and then turn to a genetic approach to block the interaction of ethanol with

63 BK  $\alpha$  without affecting basal BK channel function, by introducing a point mutation (K361N)  
64 known to selectively abolish BK channel activation by ethanol *in vitro* [15]. Our results  
65 demonstrate the key role of this BK channel ethanol-sensing site in the escalation of alcohol  
66 intake upon dependence induction. We further demonstrate that this role is not related to a  
67 differential sensitivity to ethanol's acute behavioral effects or to the metabolic and activity  
68 alterations induced by chronic exposure to ethanol. These findings provide tangible support for  
69 disabling the BK channel ethanol-sensing capacity as a strategy to hinder the transition from  
70 casual, moderate alcohol consumption to pathological patterns of alcohol abuse.

71

## 72 **Materials and Methods**

### 73 ***Animals***

74 C57BL/6J mice were obtained from The Jackson Laboratory or from The Scripps Research  
75 Institute (TSRI) rodent breeding colony. BK $\alpha$  K361N knockin (KI) mice were generated at the  
76 University of Pittsburgh. Breeders were sent to TSRI, where a colony was maintained by mating  
77 heterozygous (Het) males and females such that experimental mice were littermates. KI males  
78 were backcrossed to C57BL/6J females every 1-2 years to prevent genetic drift.  
79 Mice were maintained on a 12 h/12 h light/dark cycle. Food (Teklad LM-485, Envigo) and  
80 acidified or reverse osmosis purified water were available *ad libitum*. Sani-Chips (Envigo) were  
81 used for bedding substrate. All experiments were conducted in males and behavioral testing  
82 was started when they were at least 10 weeks old. Mice were single-housed for drinking  
83 experiments and group-housed otherwise. Testing was conducted during the dark phase of the  
84 circadian cycle, except for conditioned place preference, which was conducted during the light  
85 phase.

86 All procedures adhered to the National Institutes of Health Guide for the Care and Use of  
87 Laboratory Animals and were approved by the Institutional Animal Care and Use Committees of  
88 the University of Pittsburgh and TSRI.

89

### 90 **Generation of *BKα K361N* KI mice**

91 KI mice were produced using CRISPR/Cas9 technology as previously described in detail [16].  
92 Briefly, a sgRNA targeting *Kcnma1* in exon 9 near the intended mutation site was identified  
93 using the CRISPR Design Tool [17]. Two overlapping PCR primers (forward: GAAATTAATACG  
94 ACTCACTATAGGAGTGTCTCTAACTTCCTGAGTTTTAGAGCTAGAAATAGC; R: AAAAGCA  
95 CCGACTCGGTGCCACTTTTTCAAGTTGATAACGGACTAGCCTTATTTAACTTGCTATTTCT  
96 AGCTCTAAAAC) were used to generate a T7 promoter containing sgRNA template as  
97 described (Bassett et al., 2014). The sgRNA and Cas9 mRNA were produced by *in vitro*  
98 translation, purified (MEGAclear Kit, Ambion), ethanol precipitated, and resuspended in DEPC  
99 treated water. A 120-nucleotide single stranded DNA repair template oligonucleotide harboring  
100 the desired mutations in exon 9 of *Kcnma1* was purchased as Ultramer DNA (Integrated DNA  
101 Technologies, Coralville, IA). sgRNA (25 ng/μl), Cas9 mRNA (50 ng/μl), and repair oligo (100  
102 ng/μl) were combined and injected into the cytoplasm C57BL/6J one-cell embryos as described  
103 [18]. Embryos that survived injection were transferred to the oviduct of day 0.5 post-coitum  
104 pseudo-pregnant CD-1 recipient females. Pups resulting from injected embryos were screened  
105 for DNA sequence changes in exon 9 of the *Kcnma1* gene by PCR/DNA sequence analysis. A  
106 male founder mouse harboring the desired changes was mated to C57BL/6J females to  
107 establish the KI line. The *Kcnma1* exon 9 containing amplicon from all Het F1 animals that were  
108 shipped for the TSRI breeding colony were sequenced to verify the fidelity of the mutated locus.  
109 The founder mouse harbored no off-target mutations (data not shown) in any of the top 7 off-  
110 target sites predicted by the Off –Targets tool of the Cas9 Online Designer [19].

111 Mice were genotyped by subjecting tail clip lysates to polymerase chain reaction (PCR) using a  
112 pair of primers (forward: GCTTTGCCTCATGACCCTCT; reverse: TGAACAAGGGTGCTGCTTC  
113 A) that amplifies a 450-bp fragment of the *Kcnma1* gene. The PCR products were then digested  
114 with Tru1I and the resulting fragments were visualized by electrophoresis in an ethidium  
115 bromide-stained agarose gel. Tru1I digestion yielded two fragments (107 + 343 bp) in the wild-  
116 type (WT) allele and three fragments (107 + 149 + 194 bp) in the KI allele (see KI-specific Tru1I  
117 site in **Fig. 2A**).

118 To verify that the mutation was also present in *Kcnma1* mRNA, RNA was isolated from a KI  
119 mouse brain hemisphere using the RNeasy Plus Universal Mini Kit (Qiagen, 73404), 2 µg of  
120 RNA was reverse-transcribed using the Transcriptor First Strand cDNA Synthesis Kit with  
121 random hexamer primers (Roche, 04379012001), and a 370-bp fragment (nucleotides 1304-  
122 1673 of NM\_010610.3) was amplified from the resulting cDNA. This fragment was cloned into  
123 pBluescript II and sequenced with a T3 primer (Genewiz).

124

### 125 ***Experimental cohorts***

126 Independent cohorts of C57BL/6J males were used to test the effects of penitrem A on tremors  
127 (n=28), alcohol drinking (n=20) and saccharin drinking (n=20), as well as the effects of paxilline  
128 (n=18) and BMS-204352 (n=30) on alcohol drinking.

129 Body weights were measured in experimentally naïve mice at 6 weeks of age (WT, n=7; Het,  
130 n=12; KI, n=6). Three independent cohorts of mice, each containing an equivalent number of  
131 WT and KI mice, were tested for alcohol drinking and their data were pooled for analysis (WT,  
132 n=21; KI, n=17). Ethanol clearance rate was measured in another cohort (WT, n=3; Het, n=4;  
133 KI, n=4). Separate cohorts were tested for ethanol-induced ataxia, sedation, and hypothermia  
134 (WT, n=10; Het, n=11; KI, n=8), ethanol-induced analgesia (WT, n=7; Het, n=9; KI, n=7), and  
135 conditioned place preference (WT, n=11; KI, n=15). Two additional cohorts were used to

136 measure activity/metabolism (WT, n=8; KI, n=7) and circadian rhythmicity (WT, n=8; KI, n=8)  
137 during withdrawal from chronic intermittent ethanol (CIE) exposure.

138

### 139 ***Ethanol drinking***

140 Mice were single-housed 3 days before testing started and remained single-housed throughout  
141 the duration of the experiment. Voluntary ethanol consumption was assessed in 2-h sessions  
142 during which mice had access to a bottle of water and a bottle of 15% (v:v) ethanol (two-bottle  
143 choice [2BC]) in their home cage. 2BC sessions started at the beginning of the dark phase  
144 (except for the penitrem A study, in which sessions were started 2 h into the dark phase) and  
145 were conducted Mon-Fri. The position of the ethanol and water bottles was alternated each day  
146 to control for side preference. Ethanol intake was determined by weighing bottles before and  
147 after the session, subtracting the weight lost in bottles placed in an empty cage (to control for  
148 spill/evaporation) and dividing by the mouse bodyweight (measured weekly). A similar  
149 procedure was used to assess saccharin (0.005% w:v) consumption in the penitrem A study.

150

### 151 ***Pharmacological modulation of BK channels***

152 Penitrem A was purchased from Sigma (P3053) for tremor assessment and from Enzo Life  
153 Sciences (BML-KC157) for drinking experiments. It was dissolved in dimethylsulfoxide (DMSO)  
154 at 10 mg/mL and diluted in saline for intraperitoneal (i.p.) injection (0.1 mL per 10 g body  
155 weight). The final concentration of DMSO was 50% for the 0.2 and 0.5 mg/kg doses, and 10%  
156 for the 0.05 and 0.1 mg/kg doses. The effects of penitrem A on tremor, ethanol drinking, and  
157 saccharin drinking were tested in three independent cohorts. Tremors were scored according to  
158 the following scale [20]: 0 = no tremor; 1 = no resting tremor, short-lasting low-intensity shaking  
159 elicited by handling; 2 = no resting tremor, continuous low-intensity shaking elicited by handling;  
160 3 = spontaneous low-intensity tremor, aggravated by handling; 4 = severe spontaneous tremor,

161 convulsive episode elicited by handling; score 5 was not observed. For drinking experiments,  
162 penitrem A was injected 30 min prior to 2BC session start.  
163 Paxilline was purchased from Sigma (P2928), dissolved in DMSO at 10 mM and diluted in  
164 phosphate-buffered saline (137 mM NaCl, 2.7 mM KCl, 1.8 mM KH<sub>2</sub>PO<sub>4</sub>, 10.1 mM Na<sub>2</sub>HPO<sub>4</sub>, pH  
165 7.4) for i.p. injection (1:2000 for 22 µg/kg dose, 1:400 for 110 µg/kg dose, 1:80 for 550 µg/kg  
166 dose). Each dose was tested on a different week. Doses were tested in ascending order, and  
167 vehicle and drug treatments were counterbalanced over two consecutive days for each dose.  
168 This dose range was selected based on pilot testing that indicated reduced mobility at 1.1 mg/kg  
169 and tremors at 4.4 mg/kg, which would have confounded drinking behavior, as well as on  
170 reported anticonvulsant properties of ultra-low-dose paxilline [21].  
171 BMS-204352 was purchased from Sigma (SML1313), dissolved in DMSO at 16 mg/mL and  
172 diluted in Tween-80:saline at a 1:1:80 ratio for i.p. injection. A dose of 2 mg/kg was selected  
173 based on its ability to reverse behavioral abnormalities in *Fmr1* mutant mice [22, 23].

174

### 175 ***Ethanol drinking escalation***

176 CIE vapor inhalation was used to induce dependence and increase voluntary ethanol drinking in  
177 2BC sessions, as described in [13, 24]. Mice were first subjected to ten 2BC sessions (Mon-Fri)  
178 and each genotype was split into two groups of equivalent baseline ethanol intake. Weeks of  
179 CIE (or air) inhalation (4 x 16-h intoxication/8-h withdrawal, Mon-Fri) were then alternated with  
180 weeks of 2BC (Mon-Fri) for a total of 3-5 rounds.

181 The inhalation chambers were made of sealed plastic mouse cages (Allentown). An electronic  
182 metering pump (Iwaki EZB11D1-PC) dripped 95% ethanol into a flask placed on a warming tray  
183 at a temperature of 50°C. Drip rate was adjusted to achieve target blood ethanol concentrations  
184 (BECs) of 150-250 mg/dL. An air pump (Hakko HK-80L) conveyed vaporized ethanol from the  
185 flask to each individual chamber. The air flow was set at a rate of 15 L/min for each pair of  
186 chambers. Each chamber was diagonally divided by a mesh partition to provide single housing



187 for two mice. Mice were injected i.p. with ethanol (1.5 g/kg, PHARMCO-AAPER, 111000200)  
188 and pyrazole (68 mg/kg, Sigma-Aldrich, P56607) diluted in saline, in a volume of 0.1 mL/10 g  
189 body weight, before each 16-h ethanol vapor inhalation session. Blood was sampled from the  
190 caudal vein at the end of a 16-h intoxication session. The tip of the tail was nicked with a scalpel  
191 blade, blood was collected with a heparinized capillary tube and centrifuged at 13,000 g for 10  
192 min. BECs were measured using a GM7 analyzer (Analox) or by gas chromatography and flame  
193 ionization detection (Agilent 7820A). On CIE weeks, control (Air) mice received pyrazole only.

194

#### 195 ***Motor coordination and ethanol-induced ataxia***

196 Motor coordination was evaluated using an AccuRotor rotarod (Accuscan Instruments)  
197 accelerating from 4 to 40 rpm over 300 s. Mice were positioned on the rotating rod and speed at  
198 fall (rpm) was recorded. For motor learning, mice were subjected to 5 trials per day (30-90 min  
199 apart) for 3 consecutive days. For ataxia testing, the rod was rotating at a constant speed of 8  
200 rpm and the mice had to stay on the rod for at least 30 s to pass. Ataxia testing was conducted  
201 4-5 days after the last training trial and all mice were able to pass the criterion. They were then  
202 i.p. injected with 1.5 g/kg ethanol (0.1 mL/10 g body weight) and tested approximately every 4  
203 min until they were able to pass the criterion again. At this point, blood was collected from the  
204 retroorbital sinus and processed for BEC determination using a GM7 analyzer (Analox  
205 Instruments, London, UK).

206

#### 207 ***Ethanol-induced sedation and hypothermia***

208 Baseline body temperatures were first determined using a MicroTherma 2K thermometer  
209 (ThermoWorks) fitted with a rectal probe. Mice were then i.p. injected with 3.5 g/kg ethanol (0.2  
210 mL/10 g body weight), which resulted in loss of righting reflex (i.e., sedation). Mice were placed  
211 on their back and the time at which each mouse regained its righting reflex was recorded. At this

212 point, retroorbital blood was sampled and BECs were determined using a GM7 analyzer. Body  
213 temperatures were again recorded 60 and 120 min after injection.

214

### 215 ***Ethanol-induced analgesia***

216 A digital Randall-Selitto apparatus (Harvard Apparatus 76-0234) was used to measure  
217 mechanical nociceptive thresholds, as described in [25]. The mouse was habituated to enter a  
218 restrainer made of woven wire (stainless steel 304L 200 mesh, Shanghai YiKai) over the course  
219 of 3 days. On testing days, the mouse was gently introduced into the restrainer and the distal  
220 portion of the tail was positioned under the conic tip of the apparatus. The foot switch was then  
221 depressed to apply uniformly increasing pressure onto the tail until the first nociceptive  
222 response (struggling or squeaking) occurred. The force (in g) eliciting the nociceptive response  
223 was recorded. A cutoff force of 600 g was enforced to prevent tissue damage. The measure  
224 was repeated on the medial and proximal parts of the tail of the same mouse, with at least 30  
225 seconds between each measure. The average of the three measures (distal, medial, proximal)  
226 was used as nociceptive value for that day. The analgesic effect of ethanol was tested over 4  
227 consecutive days using a Latin square design. Testing was conducted 5 min after i.p. injection  
228 of 20% v:v ethanol (0, 1.5, 2 and 2.5 g/kg, 0.1-0.17 mL/10 g body weight).

229

### 230 ***Ethanol conditioned place preference***

231 The apparatus was made of matte black acrylic and consisted of a 42 cm long x 21 cm wide x  
232 31 cm high rectangular box (inner dimensions) with a removable central divider (ePlastics, San  
233 Diego). In one compartment, the floor was covered with coarse mesh (stainless steel 304L 10  
234 mesh, Shanghai YiKai) and the walls were decorated with white discs (5-cm dot sticker,  
235 ChromaLabel). In the other compartment, the floor was smooth and the walls were uniformly  
236 black. Pre-conditioning, conditioning, and post-conditioning trials were conducted on  
237 consecutive days, 2 h into the light phase of the circadian cycle. During the pre-conditioning and

238 post-conditioning tests, mice had access to both compartments during 15 min and their motion  
239 was video-recorded by a ceiling-mounted camera connected to ANY-maze (Stoelting Co., Wood  
240 Dale, IL). During the conditioning trials, the mice were i.p. injected with saline or 2 g/kg ethanol  
241 (20% v:v, 0.13 mL/10 g body weight) and immediately confined to the compartment paired with  
242 this treatment during 30 min. A biased design was used to assign compartments to saline or  
243 ethanol for each mouse, i.e., ethanol was always assigned to the least favorite compartment  
244 (mesh floor for 6 WT and 9 KI mice, smooth floor for 5 WT and 6 KI mice). Treatments were  
245 alternated for a total of 8 conditioning trials (4 saline and 4 ethanol) and the order of treatment  
246 was counterbalanced within each genotype. Conditioned place preference was reflected by an  
247 increase in the time spent in the ethanol-paired compartment after vs. before conditioning.

248

#### 249 ***Ethanol clearance rate***

250 Mice were i.p. injected with 2 g/kg ethanol (20% v:v, 0.13 ml/10 g body weight). Tail vein blood  
251 was collected 30 min, 90 min and 180 min later and processed for BEC determination by gas  
252 chromatography and flame ionization detection.

253

#### 254 ***Metabolism and sleep***

255 Mice were exposed to CIE every other week, starting with a priming week at sub-intoxicating  
256 BECs (WT,  $46.2 \pm 3.4$  mg/dL; KI,  $46.0 \pm 10.3$  mg/dL), and followed by 4 weeks at intoxicating  
257 BECs (WT,  $156.0 \pm 9.6$  mg/dL; KI,  $127.4 \pm 3.4$  mg/dL). Body composition was analyzed by  
258 quantitative nuclear magnetic resonance (EchoMRI 3-in-1, EchoMRI LLC, Houston, TX) 72 h  
259 after the last vapor exposure. Mice were then immediately placed in metabolic cages  
260 (Comprehensive Laboratory Animal Monitoring System, Oxymax, Columbus Instruments,  
261 Columbus, OH), at the beginning of the dark phase. The following data were collected every 18  
262 min for a total of 108 h: oxygen consumption ( $VO_2$ ), carbon dioxide production ( $VCO_2$ ), food  
263 intake, water intake, and locomotor activity. The respiratory exchange ratio (RER), calculated as

264  $VCO_2/VO_2$ , provides an indicator of the substrate being metabolized, ranging from 0.7 when the  
265 predominant fuel source is fat to 1 when the predominant fuel source is carbohydrate [26].  
266 Locomotor activity counts (beam interruptions) were used by CLAMS-HC Sleep Detection  
267 function to track sleeping bouts, as defined by 4 (or more) consecutive 10-sec epochs with 0  
268 activity counts [27]. The first 12 hours (dark phase) were considered habituation and excluded  
269 from analysis. The following 96 h were binned by 12-h light and dark phases and averaged  
270 across the 4 days for statistical analysis.

271

### 272 ***Circadian rhythmicity***

273 Mice were exposed to CIE every other week for a total of 4 weeks (average BECs: WT,  $132.2 \pm$   
274  $8.5$  mg/dL; KI,  $129.7 \pm 9.3$  mg/dL) and transferred to individual locomotor activity cages  
275 (Photobeam Activity System-Home Cage, San Diego Instruments, San Diego, CA) 72 h after  
276 the last vapor exposure. Mice were maintained on a 12 h/12 h light/dark cycle for 7 consecutive  
277 days, then switched to constant darkness for an additional 11 days. Ambulation counts  
278 represent consecutive beam breaks (8 x 4 beams in the 18.5" x 10" frame) and were collected in  
279 1-h bins. Chi-square periodogram analysis was conducted in R ('zeitgebr' package,  
280 <https://github.com/rethomics/zeitgebr>) to determine the circadian period length and relative  
281 power during constant darkness [28, 29], using the last 240 hours of recording and a 6-min  
282 resampling rate (see **Fig. 6B**).

283

### 284 ***Data analysis***

285 Data were analyzed in Statistica 13.3 (Tibco Software Inc., Palo Alto, CA). Distribution normality  
286 was evaluated using a Shapiro-Wilk test and parametric/non-parametric tests were selected  
287 accordingly for analysis of variance (ANOVA). Tests using  $t$  and  $z$  distributions were two-tailed.  
288 Tremor scores were analyzed by Kruskal-Wallis ANOVA of the area under the curve. Saccharin  
289 drinking was analyzed by Friedman ANOVA and pairwise comparisons were conducted using

290 Wilcoxon tests. Ethanol drinking was analyzed by repeated-measures (RM) ANOVA for  
291 pharmacological experiments, unpaired t-test for baseline intake in WT/KI mice, or two-way  
292 ANOVA with genotype (WT, KI) and vapor (Air, CIE) as between-subject variables (weekly  
293 averages). *Posthoc* tests and planned comparisons were conducted using Tukey's test. The  
294 effect of genotype on ataxia and sedation was analyzed by one-way ANOVA. Ethanol's  
295 clearance rate was analyzed by two-way RM-ANOVA, with time as within-subject variable and  
296 genotype as between-subject variable. The hypothermic, analgesic, and rewarding effects were  
297 also analyzed by two-way RM-ANOVA, with time, dose, or conditioning, respectively, as within-  
298 subject variable and genotype as between-subject variable. EchoMRI data, circadian period  
299 length and relative power were analyzed by two-way ANOVA (genotype, vapor). CLAMS data  
300 were analyzed by three-way RM-ANOVA, with phase as within-subject variable and genotype  
301 and vapor as between-subject variables. When there was a significant interaction between  
302 phase and vapor, two-way ANOVAs were further conducted for each phase. Data are  
303 expressed as mean  $\pm$  s.e.m.

304

## 305 **Results**

### 306 ***Non-tremorgenic pharmacological modulation of BK channel activity does not alter*** 307 ***voluntary ethanol consumption***

308 We first sought to examine the contribution of BK channels to voluntary ethanol consumption  
309 and dependence-induced intake escalation using a pharmacological approach in C57BL/6J  
310 males. Since ethanol can activate neuronal BK channels, we hypothesized that blocking BK  
311 channels may interfere with the motivational properties of ethanol and increase (to overcome  
312 BK channel blockade) or decrease (if blockade is unsurmountable) ethanol drinking.

313 We first used penitrem A, a brain-penetrant fungal alkaloid that potently inhibits BK channels  
314 [30, 31]. Penitrem A induced tremors in a dose-dependent manner (**Fig. 1A**, main effect of  
315 dose:  $H_{3,24}=23.4$ ,  $p<0.0001$ ; *posthoc* tests:  $p<0.05$  vehicle vs 0.2 mg/kg;  $p<0.001$  vehicle vs 0.5  
316 mg/kg), as reported previously [32]. The dose of 0.2 mg/kg abolished both ethanol (**Fig. 1B**,  
317 dose effect:  $F_{3,57}=65.5$ ,  $p<0.0001$ ; *posthoc* test,  $p=0.0002$  vehicle vs 0.2 mg/kg penitrem A) and  
318 saccharin (**Fig. 1C**, dose effect:  $X^2_{3,19}=36$ ,  $p<0.0001$ ; *posthoc* test,  $p=0.0001$  vehicle vs 0.2  
319 mg/kg penitrem A) drinking. The dose of 0.1 mg/kg reduced ethanol intake ( $p=0.004$ ) without  
320 affecting saccharin intake ( $p=0.97$ ). The lowest dose of 0.05 m/kg did not affect ethanol ( $p=0.95$ )  
321 or saccharin ( $p=0.68$ ) intake (**Fig. 1B-C**). Based on our previous findings in BK  $\beta 1$  and  $\beta 4$   
322 knockout (KO) mice [13], we reasoned that an effect of BK channel blockade may selectively  
323 emerge in dependent mice that exhibit higher levels of ethanol intake. Accordingly, mice were  
324 exposed to CIE to escalate their voluntary ethanol drinking (**Fig. 1B vs Fig. 1D**, effect of vapor:  
325  $F_{1,9}=141.7$ ,  $p<0.0001$ ). Under these conditions, the two lowest doses of penitrem A did not alter  
326 ethanol intake (**Fig. 1D**, dose effect:  $F_{2,16}=0.7$ ,  $p=0.52$ ).

327 Tremorgenic mycotoxins can inhibit BK channels via different mechanisms and may therefore  
328 have a differential effect on ethanol-induced potentiation of BK-mediated currents. Notably, the  
329 association of  $\beta 1$  subunits reduces BK channel sensitivity to penitrem A by 10-fold, while it does  
330 not affect sensitivity to paxilline, a highly selective BK channel blocker [31, 33]. Since  $\beta 1$   
331 subunits influence ethanol intake escalation in CIE-exposed mice [13], we next tested the effect  
332 of paxilline in both non-dependent (Air) and dependent (CIE) mice. We limited our analysis to  
333 non-tremorgenic doses (see *Methods* for dose range determination). Paxilline did not affect  
334 ethanol intake regardless of the alcohol dependence status (**Fig. 1E**, dose effect:  $F_{3,48}=1.0$ ,  
335  $p=0.42$ ; vapor effect:  $F_{1,16}=11.0$ ,  $p=0.004$ ; dose x vapor interaction:  $F_{3,48}=0.27$ ,  $p=0.85$ ).

336 To further investigate the ability of BK channels to modulate ethanol intake, we tested the effect  
337 of a BK channel opener, BMS-204352. At 2 mg/kg, a dose that rescues several behavioral

338 deficits of *Fmr1* KO mice [22, 23], BMS-204532 did not impact moderate (Air) or excessive  
339 (CIE) ethanol drinking (**Fig. 1E**, treatment effect:  $F_{1,28}=0.1$ ,  $p=0.73$ ; vapor effect:  $F_{1,28}=28.5$ ,  
340  $p<0.0001$ ; treatment x vapor interaction:  $F_{1,28}=0.6$ ,  $p=0.45$ ).

341

### 342 ***Generation and validation of BK $\alpha$ K361N knockin mice***

343 The significance of pharmacological manipulations is inherently limited because they perturb the  
344 physiological activity of BK channels rather than selectively antagonizing the effect of ethanol at  
345 BK channels. We therefore turned to a genetic approach to probe the role of ethanol's action at  
346 BK channels in the motivation to consume alcohol. Bukiya and colleagues discovered that an  
347 asparagine substitution of residue K361 of the mouse BK  $\alpha$  subunit abolishes ethanol's ability to  
348 increase BK channel steady-state activity without affecting unitary conductance, calcium  
349 sensitivity, and voltage sensitivity, thereby providing a unique opportunity to directly and  
350 selectively disrupt the effect of ethanol on BK channels [15].

351 Accordingly, we generated a knockin (KI) mouse expressing the K361N mutant instead of the  
352 wildtype (WT) BK  $\alpha$  on a C57BL/6J background. A CRISPR/Cas9 strategy was used to  
353 introduce two nucleotide mutations in the *Kcnma1* gene: A G-to-T missense mutation modifying  
354 the triplet encoding K361 into an asparagine-coding triplet, and a silent G-to-T mutation  
355 introducing a Tru1I restriction site to facilitate mouse genotyping (**Fig. 2A**). KI mice were viable  
356 and all three genotypes (KI, Het, and WT) were obtained in Mendelian proportions. The  
357 presence of the mutations in the *Kcnma1* mRNA was verified by mouse brain cDNA sequencing  
358 (**Fig. 2B**). We conducted behavioral assessments to verify that the basal function of BK  
359 channels was preserved in KI mice, based on the known phenotype of mice missing BK  $\alpha$ .  
360 Accordingly, while BK  $\alpha$  KO mice displayed 15-20% smaller body weights than their WT  
361 counterparts at 4 and 8 weeks of age [34], we found no effect of the K/N361 genotype on body

362 weight at 6 weeks of age (**Fig. 2C**,  $F_{2,22}=0.4$ ,  $p=0.70$ ). Furthermore, while BK  $\alpha$  KO mice  
363 displayed major motor coordination deficits [34], BK  $\alpha$  K361N KI mice acquired the accelerating  
364 rotarod task at the same rate as their Het and WT counterparts (**Fig. 2D**, effect of trial:  
365  $F_{14,336}=37.2$ ,  $p<0.0001$ ; effect of genotype:  $F_{2,24}=0.8$ ,  $p=0.48$ ; trial x genotype interaction:  
366  $F_{28,336}=0.8$ ,  $p=0.73$ ).

367

368 ***The BK  $\alpha$  K361N mutation hinders escalation of voluntary alcohol intake in the CIE-2BC***  
369 ***model of dependence***

370 BK  $\alpha$  WT and K361N KI mice were given access to voluntary alcohol consumption in limited-  
371 access 2BC sessions (**Fig. 3A**). There was a trend for higher intake in KI mice during the first  
372 week ( $t_{36}=-1.9$ ,  $p=0.066$ ) but the difference subsided by the second week ( $t_{36}=-1.0$ ,  $p=0.33$ ), with  
373 the two genotypes stabilizing at similar levels. Mice were then exposed to weeks of CIE (or Air  
374 only) to trigger voluntary intake escalation during intercalated weeks of 2BC drinking (**Fig. 3B**).  
375 Average BECs in WT and KI mice were  $189.6 \pm 14.2$  mg/dL and  $192.9 \pm 18.0$  mg/dL,  
376 respectively ( $t_{28}=-0.1$ ,  $p=0.89$ ). As expected, there was a significant week x vapor interaction  
377 ( $F_{4,136}=4.1$ ,  $p=0.0039$ ), reflecting the escalation of voluntary alcohol consumption in CIE-  
378 exposed mice. During the fourth postvapor week (PV4), planned comparisons detected a  
379 significant difference between Air- and CIE-exposed WT mice ( $p=0.010$ ), but not between Air-  
380 and CIE-exposed KI mice ( $p=0.76$ ), indicating that, by PV4, ethanol consumption had escalated  
381 in WT but not KI mice. Furthermore, CIE-exposed WT mice consumed significantly more alcohol  
382 than their KI counterparts ( $p=0.014$ ), while there was no difference between Air-exposed WT  
383 and KI mice ( $p=0.99$ ). In conclusion, the BK  $\alpha$  K361N mutation does not affect moderate alcohol  
384 drinking but hinders the transition to excessive alcohol intake elicited by vapor exposure.

385



386 ***The BK  $\alpha$  K361N mutation does not affect sensitivity to acute effects of alcohol***

387 We sought to determine whether the reduced propensity of BK  $\alpha$  K361N KI mice to escalate  
388 their alcohol consumption could be related to a differential sensitivity to some of the acute  
389 effects of alcohol. We first verified that there was no effect of genotype on the clearance rate of  
390 ethanol (effect of time:  $F_{2,16}=359.6$ ,  $p<0.0001$ ; effect of genotype:  $F_{2,8}=0.01$ ,  $p=0.99$ ; time x  
391 genotype interaction:  $F_{4,16}=0.2$ ,  $p=0.91$ , **Fig. 4A**). In the rotarod assay, WT, Het, and KI mice  
392 were similarly sensitive to the loss of motor coordination induced by 1.5 g/kg ethanol; there was  
393 no effect of genotype on ataxia duration ( $F_{2,26}=1.0$ ,  $p=0.37$ , **Fig. 4B**) and on BECs measured at  
394 recovery ( $F_{2,26}=2.0$ ,  $p=0.16$ , **Fig. 4C**). Likewise, WT, Het and KI mice exhibited similar durations  
395 of loss-of-righting-reflex following administration of 3.5 g/kg ethanol ( $F_{2,26}=0.5$ ,  $p=0.95$ , **Fig. 4D**)  
396 and similar BECs at recovery ( $H_{2,26}=4.1$ ,  $p=0.13$ , **Fig. 4E**). The amplitude of hypothermia was  
397 also identical across genotypes (effect of time:  $F_{2,52}=239.6$ ,  $p<0.0001$ ; effect of genotype:  
398  $F_{2,26}=0.4$ ,  $p=0.66$ ; time x genotype interaction:  $F_{4,52}=0.5$ ,  $p=0.71$ , **Fig. 4F**). Ethanol exerted a  
399 similar analgesic effects in WT, Het and KI mice at 1.5-2.5 g/kg doses (effect of dose:  
400  $F_{3,60}=61.0$ ,  $p<0.0001$ ; effect of genotype:  $F_{2,20}=2.0$ ,  $p=0.16$ ; dose x genotype interaction:  
401  $F_{6,60}=0.6$ ,  $p=0.73$ , **Fig. 4G**). Finally, the rewarding effect of 2 g/kg ethanol was equivalent in WT  
402 and KI mice, as measured by conditioned place preference (effect of conditioning:  $F_{1,24}=25.6$ ,  
403  $p<0.0001$ ; effect of genotype:  $F_{1,24}=0.6$ ,  $p=0.43$ ; conditioning x genotype interaction:  $F_{1,24}=0.04$ ,  
404  $p=0.85$ , **Fig. 4H**). Altogether, the BK  $\alpha$  K361N mutation had no influence on the sensitivity of  
405 mice to multiple behavioral and physiological acute effects of moderate and high doses of  
406 ethanol.

407

408

409 ***Ethanol's action at BK channels does not mediate the effect of chronic alcohol exposure***  
410 ***on metabolism, food intake, and locomotor activity***

411 We then tested whether, in addition to their resistance to the motivational effect of CIE on  
412 alcohol drinking, KI mice might also be spared from physiological changes relevant to AUD,  
413 such as metabolic [35] and sleep [36] disturbances. EchoMRI analysis indicated that CIE  
414 significantly altered body composition (**Fig. 5A**), reducing fat content ( $F_{1,10}=9.8$ ,  $p=0.011$ ) while  
415 increasing lean content ( $F_{1,10}=10.6$ ,  $p=0.0086$ ), in the absence of body weight change  
416 ( $F_{1,10}=0.001$ ,  $p=0.98$ , **Fig. 5B**). Metabolic monitoring also revealed increases in dark-phase food  
417 intake ( $F_{1,10}=7.3$ ,  $p=0.023$ , **Fig. 5C**) and dark-phase RER ( $F_{1,10}=15.7$ ,  $p=0.0027$ , **Fig. 5D**) in CIE-  
418 withdrawn mice. The K361N mutation did not influence any of these outcomes ( $F$ 's $<1.0$ ,  
419  $p$ 's $>0.34$  for main effect of genotype and genotype x vapor interaction). Furthermore, neither  
420 genotype nor CIE affected sleep measures (**Fig. 5E-F, Table 1**).

421 Finally, given the role of BK channels in regulating neuronal excitability in the suprachiasmatic  
422 nucleus (the primary circadian pacemaker in mammals) [37, 38] and the desynchronization of  
423 biological rhythms observed in AUD [39, 40], we sought to determine whether the action of  
424 ethanol on BK channels could be responsible for a disruption of circadian rhythmicity in CIE-  
425 exposed mice. Under a standard light-dark cycle, the ambulation of CIE-exposed mice was  
426 significantly reduced up to withdrawal day 8 (vapor x time interaction:  $F_{13,156}=10.3$ ,  $p<0.0001$ ,  
427 see **Fig. 6A** for significance of vapor effect at individual timepoints). There was no significant  
428 influence of genotype on ambulation nor on the depressant effect of CIE withdrawal (genotype  
429 effect:  $F_{1,12}=0.5$ ,  $p=0.49$ ; genotype x vapor interaction:  $F_{1,12}=0.08$ ,  $p=0.78$ ). To test the function  
430 of the intrinsic pacemaker, mice were then switched to constant darkness for 10 days and chi-  
431 square periodogram analysis was used to determine the period length and relative power of the  
432 dominant circadian component of ambulation counts (**Fig. 6B-D**). Two-way ANOVA revealed a  
433 significant interaction between vapor and genotype on period length ( $F_{1,12}=6.5$ ,  $p=0.025$ ), but

434 none of the pairwise comparisons reached significance. Neither the K361N mutation nor alcohol  
435 withdrawal significantly affected the relative power (genotype effect:  $F_{1,12}=2.5$ ,  $p=0.14$ ; vapor  
436 effect:  $F_{1,12}=2.2$ ,  $p=0.17$ ; genotype x vapor interaction:  $F_{1,12}=0.60$ ,  $p=0.45$ ).

437 In conclusion, the lack of voluntary alcohol intake escalation observed in BK  $\alpha$  K361N KI mice  
438 after 4 weeks of CIE exposure is not due to a differential sensitivity to the metabolic and  
439 locomotor effects of CIE withdrawal.

440

## 441 **Discussion**

442 Our data demonstrate that preventing ethanol from interacting with BK pore-forming subunit  
443 impedes the escalation of voluntary alcohol drinking in mice exposed to CIE, without altering the  
444 initiation or maintenance of alcohol drinking in control mice. Surprisingly, this manipulation did  
445 not affect the response of mice to acute ethanol or withdrawal from CIE, as evaluated in multiple  
446 behavioral and physiological assays. We also did not observe a consistent effect of BK channel  
447 pharmacological modulators administered acutely at non-tremorgenic doses on ethanol intake.  
448 Altogether, these findings support a critical role of ethanol's action at BK channels in the  
449 induction of neuroadaptations driving adverse motivational consequences of chronic alcohol  
450 exposure in mammals, which has relevance for AUD in humans.

451 The major behavioral disturbances elicited by the blockade of BK channels have historically  
452 been a hurdle to analyze the behavioral relevance of ethanol's action at this target. This  
453 limitation is illustrated by the results of our pharmacological experiments, whereby the dose-  
454 dependent effects of penitrem A on ethanol intake were impossible to disentangle from tremor  
455 induction. Paxilline injected at doses at least ten times lower than doses typically used to induce  
456 tremors (6-8 mg/kg, [33, 41]) did not cause overt behavioral abnormalities and marginally  
457 increased ethanol intake. An even lower dose of paxilline had been previously shown to reverse

458 picrotoxin- and pentylenetetrazole-induced seizures in the absence of tremors [21], which  
459 suggest that the doses we used were high enough to significantly reach and block BK channels  
460 in the mouse brain. On the other hand, BK channel activation by BMS-204352, at a dose known  
461 to acutely reverse the sensory hypersensitivity and social interaction deficits of *Fmr1* KO mice  
462 [22, 23], had no effect on ethanol intake. In our earlier work in BK  $\beta$ 1 and BK  $\beta$ 4 KO mice,  
463 genotypic differences in ethanol intake only emerged after CIE exposure [13], suggesting that  
464 CIE-exposed mice may be more sensitive to BK channel modulation. However, the effects of  
465 penitrem A, paxilline, and BMS-204352 were qualitatively similar in Air- and CIE-exposed mice.  
466 In conclusion, aside from tremors, acute pharmacological modulation of BK channels does not  
467 interfere with alcohol drinking, which suggests that ethanol's interaction with BK channels is  
468 unlikely to mediate the sensory, interoceptive, and reinforcing properties of this molecule.

469 To overcome the limitations of BK channel pharmacological modulation, we turned to a genetic  
470 approach capitalizing on our current understanding of the structural determinants of ethanol's  
471 action of BK channels, with K361 playing a key role as hydrogen bond donor in ethanol  
472 recognition by the BK  $\alpha$  cytoplasmic tail domain and the ensuing increase in channel open  
473 probability [15]. Importantly, while the K361N substitution confers refractoriness to 100 mM  
474 ethanol, it does not alter basal steady-state activity of BK channels, nor their sensitivity to the  
475 BK channel primary endogenous activators: voltage and intracellular calcium [15]. This  
476 selectivity is supported by our observation that K361N KI mice do not display reduced body  
477 weights or motor learning deficits, as reduced BK channel function would be expected to  
478 partially replicate the previously described phenotypes of BK  $\alpha$  KO mice [34].

479 The K361N substitution did not alter levels of alcohol intake during acquisition, nor during  
480 maintenance in Air-exposed mice. This finding is consistent with our earlier work in BK  $\beta$ 1 and  
481 BK  $\beta$ 4 KO mice, which did not differ from their WT counterparts in several paradigms of  
482 voluntary alcohol drinking unless they were also exposed to CIE [13]. Our data therefore

483 demonstrate that ethanol's action at BK channels is not necessary for alcohol to exert positive  
484 reinforcing effects. On the other hand, alcohol intake escalation induced by CIE exposure was  
485 blunted in K361N KI mice, indicating that ethanol's action at BK channels does contribute to  
486 increasing the motivation to self-administer alcohol in mice that undergo repeated cycles of  
487 alcohol intoxication and withdrawal. This finding is in accordance with the blunted escalation  
488 displayed by BK  $\beta 4$  KO mice, in which ethanol's action at neuronal BK channel undergoes rapid  
489 desensitization, as well as with the accelerated escalation displayed by BK  $\beta 1$  KO mice, in  
490 which ethanol-induced potentiation of BK-mediated currents is expected to be enhanced [12,  
491 13, 42]. Altogether, these data indicate that the action of ethanol on BK channels during CIE  
492 promotes alcohol drinking escalation.

493 Accordingly, we propose that molecular adaptations resulting from chronic activation of BK  
494 channels by ethanol facilitate the progression to dependence. This conjecture aligns with  
495 previous observations in flies, where increased expression of the *slo* gene, which encodes *D.*  
496 *melanogaster* BK channel pore-forming subunit, represents a counter-adaptation responsible for  
497 the development of tolerance to sedation, as well as withdrawal-associated hyperexcitability [8-  
498 11]. Future studies will determine the nature of BK-dependent molecular adaptations in mice.  
499 Based on the network of molecules known to physically interact with BK channels, a plethora of  
500 proteins, including calcium channels and cytoskeletal elements, may be involved [43].  
501 Furthermore, given the ability of nuclear BK channels to influence nuclear calcium signaling,  
502 cAMP response element-binding protein-dependent transcriptional activity may also be recruited  
503 [44, 45].

504 A low level of response to alcohol represents a strong risk factor for an individual's propensity to  
505 develop an AUD [46]. We therefore hypothesized that the blunted escalation of K361N KI mice  
506 might be linked to a reduced sensitivity to alcohol's acute behavioral and physiological effects.  
507 However, we did not detect any effect of the K361N mutation, in the heterozygous or

508 homozygous state, on the responses to low (ataxia), moderate (analgesia, reward), or high  
509 (sedation, hypothermia) doses of ethanol. Our data therefore indicate that ethanol's action at  
510 BK  $\alpha$  K361 does not mediate alcohol intoxication in mice and that reduced sensitivity does not  
511 explain the reduced propensity of K361N mice to escalate their voluntary alcohol intake upon  
512 CIE exposure.

513 We hypothesized that, aside from alcohol drinking escalation, ethanol's action at BK channels  
514 may mediate other physiological consequences of CIE exposure. We found that 4 weeks of CIE  
515 significantly altered the body composition of mice, reducing fat content and increasing lean  
516 content without affecting their total body mass. This observation is consistent with reports of  
517 reduced body fat in chronic alcoholics, in the absence of body weight change and in proportion  
518 to the level of alcohol consumption [47-50]. Studies in mice chronically fed an alcohol liquid diet  
519 have indicated that chronic alcohol reduces white, rather than brown, adipose tissue and that  
520 such lipolysis is associated with hepatic steatosis, i.e. ectopic deposition of fat in the liver [see  
521 35 for review]. Interestingly, CIE-exposed rats and mice do not show evidence of hepatic  
522 steatosis [51, 52]. The CIE procedure may therefore induce changes in lipid metabolism that  
523 reflect an early stage of the development of alcohol liver disease. Multiple molecular  
524 mechanisms have been proposed to underlie alcohol-induced lipolysis [reviewed in 35]; our data  
525 indicate that chronic activation of BK channels by ethanol is not implicated.

526 The leaner phenotype of CIE-exposed mice was associated with a significant increase in food  
527 intake during the first week of withdrawal, which may reflect a homeostatic adaptation to the  
528 loss of body fat. In humans, chronic alcohol abuse increases daily caloric intake, yet alcohol  
529 represents a substantial fraction of this intake, such that energy intake provided only by food  
530 ingestion is typically lower than in healthy counterparts [47, 48, 53]. In one study, 14 days of  
531 abstinence normalized the nutritional status of the alcoholic subjects, but it is not known whether  
532 a compensatory increase in food intake may have occurred during their first week of abstinence

533 [53]. Withdrawal from CIE was also associated with a robust increase in RER, reflecting  
534 preferential utilization of carbohydrates as a fuel. The dark-phase RER of CIE-exposed mice  
535 even approached the maximal theoretical value of 1 (i.e., carbohydrates used as sole  
536 substrate). This RER pattern may result from deficient lipid storage, as reflected by reduced  
537 body fat, and a corresponding inability to sustain normal levels of fatty acid oxidation. However,  
538 this observation contrasts with the lower respiratory quotient, higher lipid oxidation, and reduced  
539 carbohydrate oxidation reported in human alcoholics, which all normalize after three months of  
540 abstinence [47, 48, 53, 54]. To the best of our knowledge, the possibility that a rebound  
541 increase in respiratory quotient may occur during the first week of abstinence has not been  
542 explored in humans. In any case, the phenotype of KI mice indicates that the action of ethanol  
543 at BK channels is not responsible for the nutritional and metabolic changes associated with  
544 early withdrawal from chronic alcohol exposure.

545 Sleep disturbances are a hallmark of AUD disorders; insomnia is commonly experienced during  
546 abstinence and may contribute to relapse [36]. In mice, 4 weeks of CIE exposure combined with  
547 2BC reduces the quantity and quality of slow-wave sleep 4 days into withdrawal [55]. In the  
548 present study, CIE did not affect sleep parameters recorded in the CLAMS chambers (bouts of  
549 inactivity > 40 s). It is possible that this methodology is not sensitive enough or that concomitant  
550 2BC experience is critical to detect sleep alteration. AUD have also been associated with a  
551 dysregulation of the circadian rhythm [40]. While CIE strongly reduced locomotor activity across  
552 both light and dark phases up to 8 days into withdrawal, it did not significantly affect free-running  
553 circadian period and amplitude. These observations extend similar findings from an earlier study  
554 in which C57BL/6J males had been exposed to 3 weeks of CIE [56]. These negative results  
555 precluded us from testing the role of BK channels in the effects of chronic alcohol exposure on  
556 sleep and circadian rhythm.

557 In conclusion, our data show that, in the mouse, ethanol's interaction with BK channels  
558 facilitates the escalation of voluntary alcohol intake produced by repeated cycles of alcohol  
559 intoxication and withdrawal. This role is dissociated from the metabolic and activity changes  
560 produced by chronic alcohol exposure and may instead contribute to increasing the motivational  
561 drive to consume alcohol. Furthermore, we demonstrate that BK  $\alpha$  K361 does not mediate  
562 several acute behavioral effects of ethanol in mice. Accordingly, we propose that, in humans,  
563 BK channels may represent a valid target to counter allostatic adaptations associated with  
564 chronic alcohol exposure without blocking ethanol's acute effects. Future studies will aim to  
565 identify the brain regions and cellular populations in which BK channels may be gating  
566 molecular changes driving the transition to alcohol dependence.



567 **Acknowledgments**

568 We thank Dr. Elizabeth Thomas for lending us her rotarod apparatus, Dr. Mark Azar for his help  
569 with the tremor experiment, Brandon Hedges for his assistance with the paxilline experiment,  
570 and Carolyn Ferguson for expert technical assistance. We are also grateful for the support of  
571 TSRI's Animal Models Core, the Integrative Neuroscience Initiative on Alcoholism-  
572 Neuroimmune and the TSRI Alcohol Research Center Animal Models Core, which conducted  
573 blood ethanol concentration analysis for this study. This work was supported by the following  
574 grants from the National Institutes of Health: AA020913 (CC), AA006420 (CC, AJR), AA026685  
575 (CC), AA027636 (CC), AA027372 (CC), AA020889 (GEH), AA10422 (GEH).

576 **Author contributions**

577 AO, MK, AJR, and CC performed behavioral experiments. AO, PB, AJR, and CC analyzed data.

578 CC and AJR designed experiments. GEH generated the knockin mice. AMD contributed to

579 conceptualization. CC conceived the study, acquired funds, and wrote the manuscript.

580 **Disclosure**

581 The authors declare no conflict of interest.

582 **References**

- 583 1. Dopico, A.M., Lemos, J.R., and Treistman, S.N. Ethanol increases the activity of large  
584 conductance, Ca(2+)-activated K<sup>+</sup> channels in isolated neurohypophysial terminals. *Mol*  
585 *Pharmacol*, 1996. **49**(1): p. 40-8.
- 586 2. Martin, G., et al. Somatic localization of a specific large-conductance calcium-activated  
587 potassium channel subtype controls compartmentalized ethanol sensitivity in the nucleus  
588 accumbens. *J Neurosci*, 2004. **24**(29): p. 6563-72.
- 589 3. Abrahao, K.P., Chancey, J.H., Chan, C.S., and Lovinger, D.M. Ethanol-Sensitive  
590 Pacemaker Neurons in the Mouse External Globus Pallidus.  
591 *Neuropsychopharmacology*, 2017. **42**(5): p. 1070-1081.
- 592 4. Dopico, A.M., Bukiya, A.N., Kuntamallappanavar, G., and Liu, J. Modulation of BK  
593 Channels by Ethanol. *Int Rev Neurobiol*, 2016. **128**: p. 239-79.
- 594 5. Davies, A.G., et al. A central role of the BK potassium channel in behavioral responses  
595 to ethanol in *C. elegans*. *Cell*, 2003. **115**(6): p. 655-66.
- 596 6. Davis, S.J., Scott, L.L., Hu, K., and Pierce-Shimomura, J.T. Conserved single residue in  
597 the BK potassium channel required for activation by alcohol and intoxication in *C.*  
598 *elegans*. *J Neurosci*, 2014. **34**(29): p. 9562-73.
- 599 7. Cowmeadow, R.B., Krishnan, H.R., and Atkinson, N.S. The slowpoke gene is necessary  
600 for rapid ethanol tolerance in *Drosophila*. *Alcohol Clin Exp Res*, 2005. **29**(10): p. 1777-  
601 86.
- 602 8. Cowmeadow, R.B., et al. Ethanol tolerance caused by slowpoke induction in *Drosophila*.  
603 *Alcohol Clin Exp Res*, 2006. **30**(5): p. 745-53.
- 604 9. Ghezzi, A., Krishnan, H.R., and Atkinson, N.S. Susceptibility to ethanol withdrawal  
605 seizures is produced by BK channel gene expression. *Addict Biol*, 2014. **19**(3): p. 332-7.

- 606 10. Ghezzi, A., Pohl, J.B., Wang, Y., and Atkinson, N.S. BK channels play a counter-  
607 adaptive role in drug tolerance and dependence. *Proc Natl Acad Sci U S A*, 2010.  
608 **107**(37): p. 16360-5.
- 609 11. Ghezzi, A., Al-Hasan, Y.M., Larios, L.E., Bohm, R.A., and Atkinson, N.S. slo K(+)  
610 channel gene regulation mediates rapid drug tolerance. *Proc Natl Acad Sci U S A*, 2004.  
611 **101**(49): p. 17276-81.
- 612 12. Martin, G.E., et al. Identification of a BK channel auxiliary protein controlling molecular  
613 and behavioral tolerance to alcohol. *Proc Natl Acad Sci U S A*, 2008. **105**(45): p. 17543-  
614 8.
- 615 13. Kreifeldt, M., Le, D., Treistman, S.N., Koob, G.F., and Contet, C. BK channel beta1 and  
616 beta4 auxiliary subunits exert opposite influences on escalated ethanol drinking in  
617 dependent mice. *Front Integr Neurosci*, 2013. **7**: p. 105.
- 618 14. Kreifeldt, M., Cates-Gatto, C., Roberts, A.J., and Contet, C. BK Channel beta1 Subunit  
619 Contributes to Behavioral Adaptations Elicited by Chronic Intermittent Ethanol Exposure.  
620 *Alcohol Clin Exp Res*, 2015. **39**(12): p. 2394-402.
- 621 15. Bukiya, A.N., et al. An alcohol-sensing site in the calcium- and voltage-gated, large  
622 conductance potassium (BK) channel. *Proc Natl Acad Sci U S A*, 2014. **111**(25): p.  
623 9313-8.
- 624 16. Blednov, Y.A., et al. Mutation of the inhibitory ethanol site in GABA<sub>A</sub> rho1 receptors  
625 promotes tolerance to ethanol-induced motor incoordination. *Neuropharmacology*, 2017.  
626 **123**: p. 201-209.
- 627 17. Hsu, P.D., et al. DNA targeting specificity of RNA-guided Cas9 nucleases. *Nat*  
628 *Biotechnol*, 2013. **31**(9): p. 827-32.
- 629 18. Yang, H., Wang, H., and Jaenisch, R. Generating genetically modified mice using  
630 CRISPR/Cas-mediated genome engineering. *Nat Protoc*, 2014. **9**(8): p. 1956-68.

- 631 19. Guo, D., et al. Online High-throughput Mutagenesis Designer Using Scoring Matrix of  
632 Sequence-specific Endonucleases. *J Integr Bioinform*, 2015. **12**(1): p. 35-48.
- 633 20. Gallagher, R.T. and Hawkes, A.D. The potent tremorgenic neurotoxins lolitrem B and  
634 aflatrem: a comparison of the tremor response in mice. *Experientia*, 1986. **42**(7): p. 823-  
635 5.
- 636 21. Sheehan, J.J., Benedetti, B.L., and Barth, A.L. Anticonvulsant effects of the BK-channel  
637 antagonist paxilline. *Epilepsia*, 2009. **50**(4): p. 711-20.
- 638 22. Zhang, Y., et al. Dendritic channelopathies contribute to neocortical and sensory  
639 hyperexcitability in *Fmr1*(-/-) mice. *Nat Neurosci*, 2014. **17**(12): p. 1701-9.
- 640 23. Hebert, B., et al. Rescue of fragile X syndrome phenotypes in *Fmr1* KO mice by a BKCa  
641 channel opener molecule. *Orphanet J Rare Dis*, 2014. **9**: p. 124.
- 642 24. Becker, H.C. and Lopez, M.F. Increased ethanol drinking after repeated chronic ethanol  
643 exposure and withdrawal experience in C57BL/6 mice. *Alcohol Clin Exp Res*, 2004.  
644 **28**(12): p. 1829-38.
- 645 25. Elhabazi, K., Ayachi, S., Ilien, B., and Simonin, F. Assessment of morphine-induced  
646 hyperalgesia and analgesic tolerance in mice using thermal and mechanical nociceptive  
647 modalities. *J Vis Exp*, 2014(89): p. e51264.
- 648 26. McLean, J.A. and Tobin, G. Animal and Human Calorimetry. 1987, Cambridge:  
649 Cambridge University Press. 338.
- 650 27. Pack, A.I., et al. Novel method for high-throughput phenotyping of sleep in mice. *Physiol*  
651 *Genomics*, 2007. **28**(2): p. 232-8.
- 652 28. Enright, J.T. The search for rhythmicity in biological time-series. *J Theor Biol*, 1965. **8**(3):  
653 p. 426-68.
- 654 29. Refinetti, R. Laboratory instrumentation and computing: comparison of six methods for  
655 the determination of the period of circadian rhythms. *Physiol Behav*, 1993. **54**(5): p. 869-  
656 75.

- 657 30. Knaus, H.G., et al. Tremorgenic indole alkaloids potently inhibit smooth muscle high-  
658 conductance calcium-activated potassium channels. *Biochemistry*, 1994. **33**(19): p.  
659 5819-28.
- 660 31. Asano, S., et al. Penitrem A as a tool for understanding the role of large conductance  
661 Ca(2+)/voltage-sensitive K(+) channels in vascular function. *J Pharmacol Exp Ther*,  
662 2012. **342**(2): p. 453-60.
- 663 32. Jortner, B.S., Ehrich, M., Katherman, A.E., Huckle, W.R., and Carter, M.E. Effects of  
664 prolonged tremor due to penitrem A in mice. *Drug Chem Toxicol*, 1986. **9**(2): p. 101-16.
- 665 33. Imlach, W.L., et al. The molecular mechanism of "ryegrass staggers," a neurological  
666 disorder of K<sup>+</sup> channels. *J Pharmacol Exp Ther*, 2008. **327**(3): p. 657-64.
- 667 34. Sausbier, M., et al. Cerebellar ataxia and Purkinje cell dysfunction caused by Ca<sup>2+</sup>-  
668 activated K<sup>+</sup> channel deficiency. *Proc Natl Acad Sci U S A*, 2004. **101**(25): p. 9474-8.
- 669 35. Steiner, J.L. and Lang, C.H. Alcohol, Adipose Tissue and Lipid Dysregulation.  
670 *Biomolecules*, 2017. **7**(1).
- 671 36. Chakravorty, S., Chaudhary, N.S., and Brower, K.J. Alcohol Dependence and Its  
672 Relationship With Insomnia and Other Sleep Disorders. *Alcohol Clin Exp Res*, 2016.  
673 **40**(11): p. 2271-2282.
- 674 37. Meredith, A.L., et al. BK calcium-activated potassium channels regulate circadian  
675 behavioral rhythms and pacemaker output. *Nat Neurosci*, 2006. **9**(8): p. 1041-9.
- 676 38. Harvey, J.R.M., Plante, A.E., and Meredith, A.L. Ion Channels Controlling Circadian  
677 Rhythms in Suprachiasmatic Nucleus Excitability. *Physiol Rev*, 2020. **100**(4): p. 1415-  
678 1454.
- 679 39. Lindberg, D., Andres-Beck, L., Jia, Y.F., Kang, S., and Choi, D.S. Purinergic Signaling in  
680 Neuron-Astrocyte Interactions, Circadian Rhythms, and Alcohol Use Disorder. *Front*  
681 *Physiol*, 2018. **9**: p. 9.

- 682 40. Meyrel, M., Rolland, B., and Geoffroy, P.A. Alterations in circadian rhythms following  
683 alcohol use: A systematic review. *Prog Neuropsychopharmacol Biol Psychiatry*, 2020.  
684 **99**: p. 109831.
- 685 41. Combs, M.D., Hamlin, A., and Quinn, J.C. A single exposure to the tremorgenic  
686 mycotoxin lolitrem B inhibits voluntary motor activity and spatial orientation but not  
687 spatial learning or memory in mice. *Toxicol*, 2019. **168**: p. 58-66.
- 688 42. Kuntamallappanavar, G. and Dopico, A.M. Alcohol modulation of BK channel gating  
689 depends on beta subunit composition. *J Gen Physiol*, 2016. **148**(5): p. 419-440.
- 690 43. Kim, H. and Oh, K.H. Protein Network Interacting with BK Channels. *Int Rev Neurobiol*,  
691 2016. **128**: p. 127-61.
- 692 44. Bengtson, C.P. and Bading, H. Nuclear calcium signaling. *Adv Exp Med Biol*, 2012. **970**:  
693 p. 377-405.
- 694 45. Li, B., et al. Nuclear BK channels regulate gene expression via the control of nuclear  
695 calcium signaling. *Nat Neurosci*, 2014. **17**(8): p. 1055-63.
- 696 46. Schuckit, M.A. Low level of response to alcohol as a predictor of future alcoholism. *Am J*  
697 *Psychiatry*, 1994. **151**(2): p. 184-9.
- 698 47. Addolorato, G., Capristo, E., Greco, A.V., Stefanini, G.F., and Gasbarrini, G. Energy  
699 expenditure, substrate oxidation, and body composition in subjects with chronic  
700 alcoholism: new findings from metabolic assessment. *Alcohol Clin Exp Res*, 1997. **21**(6):  
701 p. 962-7.
- 702 48. Addolorato, G., Capristo, E., Greco, A.V., Stefanini, G.F., and Gasbarrini, G. Influence of  
703 chronic alcohol abuse on body weight and energy metabolism: is excess ethanol  
704 consumption a risk factor for obesity or malnutrition? *J Intern Med*, 1998. **244**(5): p. 387-  
705 95.



- 706 49. Addolorato, G., et al. Body composition changes induced by chronic ethanol abuse:  
707 evaluation by dual energy X-ray absorptiometry. *Am J Gastroenterol*, 2000. **95**(9): p.  
708 2323-7.
- 709 50. Liangpunsakul, S., Crabb, D.W., and Qi, R. Relationship among alcohol intake, body fat,  
710 and physical activity: a population-based study. *Ann Epidemiol*, 2010. **20**(9): p. 670-5.
- 711 51. Mouton, A.J., et al. Alcohol Vapor Inhalation as a Model of Alcohol-Induced Organ  
712 Disease. *Alcohol Clin Exp Res*, 2016. **40**(8): p. 1671-8.
- 713 52. Xu, J., et al. Blockade of IL-17 signaling reverses alcohol-induced liver injury and  
714 excessive alcohol drinking in mice. *JCI Insight*, 2020. **5**(3).
- 715 53. Levine, J.A., Harris, M.M., and Morgan, M.Y. Energy expenditure in chronic alcohol  
716 abuse. *Eur J Clin Invest*, 2000. **30**(9): p. 779-86.
- 717 54. Addolorato, G., et al. Three months of abstinence from alcohol normalizes energy  
718 expenditure and substrate oxidation in alcoholics: a longitudinal study. *Am J*  
719 *Gastroenterol*, 1998. **93**(12): p. 2476-81.
- 720 55. Huitron-Resendiz, S., et al. Effects of Withdrawal from Chronic Intermittent Ethanol  
721 Exposure on Sleep Characteristics of Female and Male Mice. *Alcohol Clin Exp Res*,  
722 2018. **42**(3): p. 540-550.
- 723 56. Logan, R.W., McCulley, W.D., 3rd, Seggio, J.A., and Rosenwasser, A.M. Effects of  
724 withdrawal from chronic intermittent ethanol vapor on the level and circadian periodicity  
725 of running-wheel activity in C57BL/6J and C3H/HeJ mice. *Alcohol Clin Exp Res*, 2012.  
726 **36**(3): p. 467-76.

727

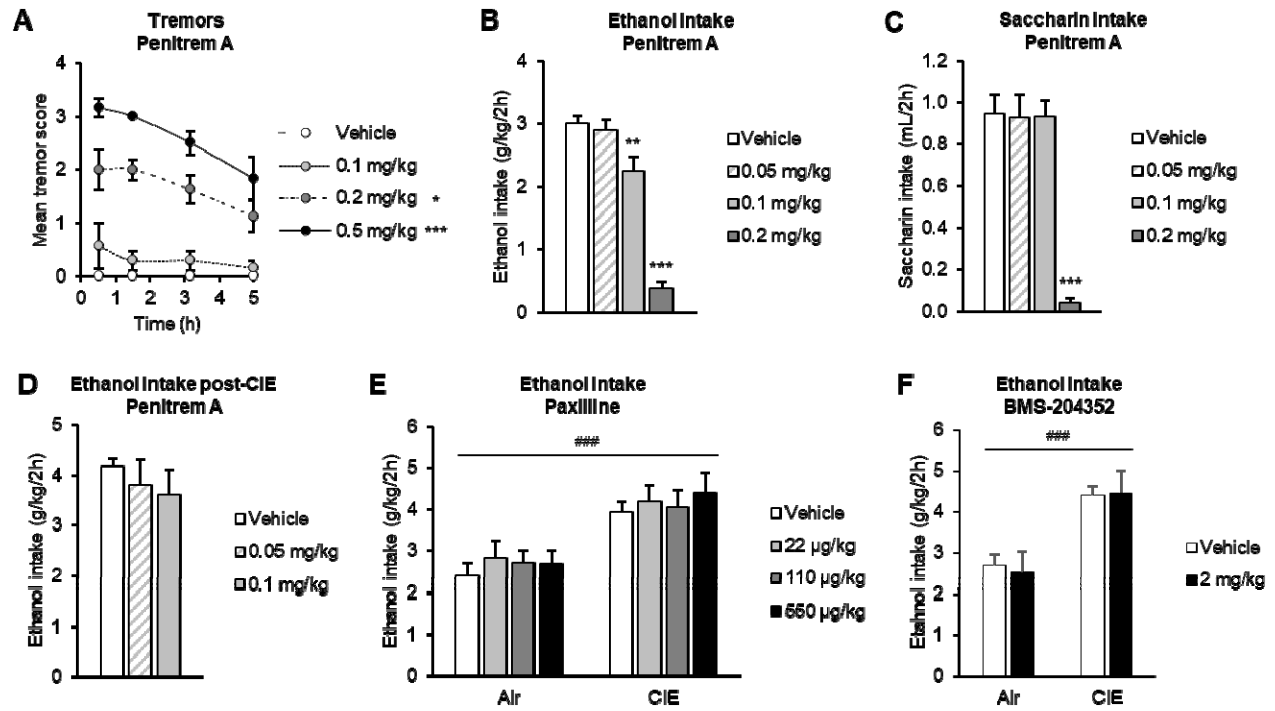

728

729

730

731

732

733

734

735

736

737

738

739

740

741

742

**Figure 1. Low-dose pharmacological inhibition or activation of BK channels does not consistently alter alcohol drinking.** **A.** Penitrem A, a BK channel blocker, induced tremors in a dose-dependent manner in alcohol-naïve C57BL/6J males (n=28, between-subject design). **B-F.** C57BL/6J male mice were given access to voluntary alcohol (**B, D-F**) or saccharin (**C**) consumption in 2-h two-bottle choice sessions. Some mice were exposed to chronic intermittent ethanol (CIE) vapor inhalation to induce dependence and increase voluntary ethanol intake, compared to mice inhaling air only (Air). **B-D.** Penitrem A reduced alcohol (**B**, n=20, within-subject design) and saccharin (**C**, n=20, within-subject design) intake at doses inducing tremors. CIE exposure did not sensitize mice to the effect of penitrem A (**D**, n=20, same mice as in **B**, within-subject design). **E.** Paxilline, a BK channel blocker, did not affect alcohol intake, across a range of non-tremorgenic doses and regardless of the dependence status of mice (n=18). **F.** BMS-204352, a BK channel opener, did not affect alcohol intake in Air or CIE mice (n=30). Significant difference with vehicle: \*, p<0.05; \*\*, p<0.01; \*\*\*, p<0.001. Significant main effect of CIE: ###, p<0.001. Data are shown as mean ± s.e.m.

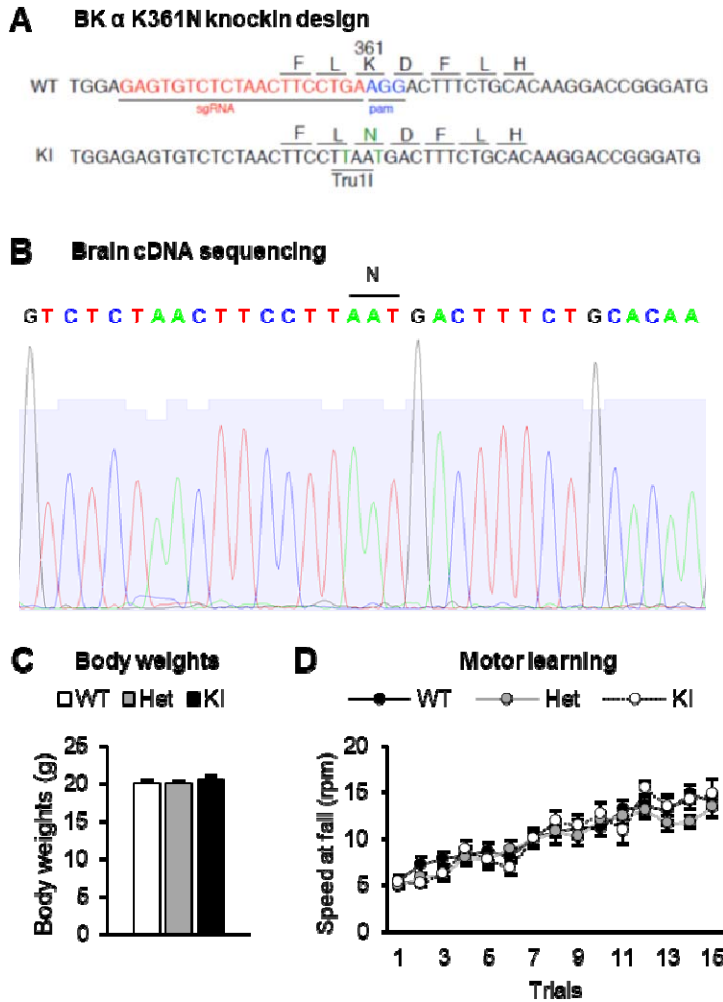

743

744 **Figure 2. Generation of BK  $\alpha$  K361N knockin (KI) mice.** **A.** Design of the CRISPR/Cas9  
745 construct used to introduce the K361N mutation in C57BL/6J mice. The single guide RNA  
746 (sgRNA) sequence is shown in red, the protospacer adjacent motif (PAM) is shown in blue, and  
747 the two mutated nucleotides are shown in green. WT, wildtype allele; KI, knockin allele. **B.**  
748 Verification of the mutated sequence in cDNA prepared from the brain of a K361N KI mouse.  
749 The triplet encoding the K361N mutation is highlighted. **C.** Body weights measured in males at 6  
750 weeks of age (WT, n=7; Het, n=12; KI, n=6). **D.** Motor coordination measured in the  
751 accelerating rotarod assay in adult males (WT, n=10; Het, n=11; KI, n=8). There was no effect  
752 of genotype on either measure. Data are shown as mean  $\pm$  s.e.m.

|                           |                           |                 |                           |                 |                           |                 |                           |                 |                           |
|---------------------------|---------------------------|-----------------|---------------------------|-----------------|---------------------------|-----------------|---------------------------|-----------------|---------------------------|
| 2BC – BL1<br>2 h x 5 days | 2BC – BL2<br>2 h x 5 days | CIE<br>4 cycles | 2BC – PV1<br>2 h x 5 days | CIE<br>4 cycles | 2BC – PV2<br>2 h x 5 days | CIE<br>4 cycles | 2BC – PV3<br>2 h x 5 days | CIE<br>4 cycles | 2BC – PV4<br>2 h x 5 days |
|---------------------------|---------------------------|-----------------|---------------------------|-----------------|---------------------------|-----------------|---------------------------|-----------------|---------------------------|

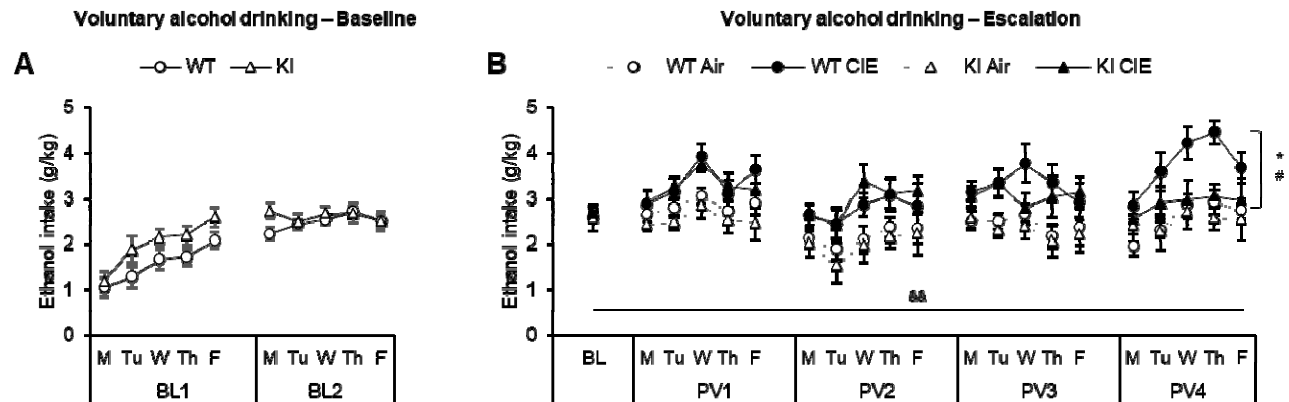

753

754 **Figure 3. The BK  $\alpha$  K361N mutation hinders alcohol drinking escalation in the CIE-2BC**  
755 **model of dependence. A-B.** BK  $\alpha$  K361N WT (n=21) and KI (n=17) mice were given access to  
756 voluntary alcohol consumption in 2-h two-bottle choice sessions prior to (A, and BL, baseline, in  
757 B) and in-between weeks of chronic intermittent ethanol (CIE) vapor inhalation (B). Statistical  
758 analysis was conducted on weekly averages. There was a significant week x vapor interaction  
759 (&&,  $p < 0.01$ ). During PV4, CIE-exposed WT mice (n=10) consumed significantly more alcohol  
760 than their Air-exposed counterparts (n=11,  $p = 0.010$ , #) and than CIE-exposed KI mice (n=9,  
761  $p = 0.014$ , \*). In contrast, there was no difference between Air (n=8) and CIE-exposed KI mice  
762 ( $p = 0.76$ ). Data are shown as mean  $\pm$  s.e.m.

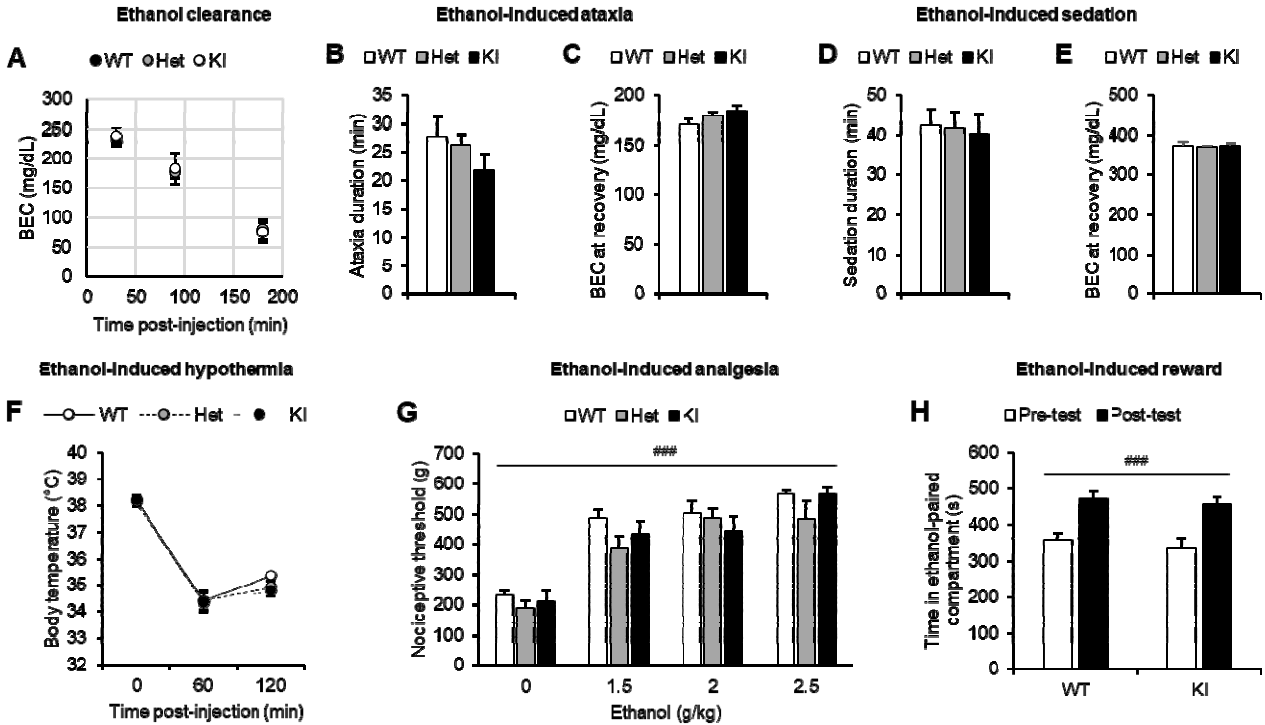

763

764

**Figure 4. The BK  $\alpha$  K361N mutation does not affect sensitivity to acute effects of alcohol**

765

Measures of alcohol metabolism and intoxication were obtained in BK  $\alpha$  K361N WT, Het and KI

766

mice acutely exposed to ethanol (i.p.). **A**. Blood ethanol concentration (BEC) clearance time-

767

course. **B-H**. Ethanol-induced ataxia (**B-C**, fixed-speed rotarod), sedation (**D-E**, loss of righting

768

reflex), hypothermia (**F**), analgesia (**G**, tail pressure test) and reward (**H**, conditioned place

769

preference). **###**, effect of ethanol,  $p < 0.001$ . None of the measures was significantly affected by

770

genotype. Sample sizes were as follows: **A**: WT,  $n=3$ ; Het,  $n=4$ ; KI,  $n=4$ . **B-F**: WT,  $n=10$ ; Het,

771

$n=11$ ; KI,  $n=8$ . **G**: WT,  $n=7$ ; Het,  $n=9$ ; KI,  $n=7$ . **H**: WT,  $n=11$ ; KI,  $n=15$ . Data are shown as mean

772

$\pm$  s.e.m.

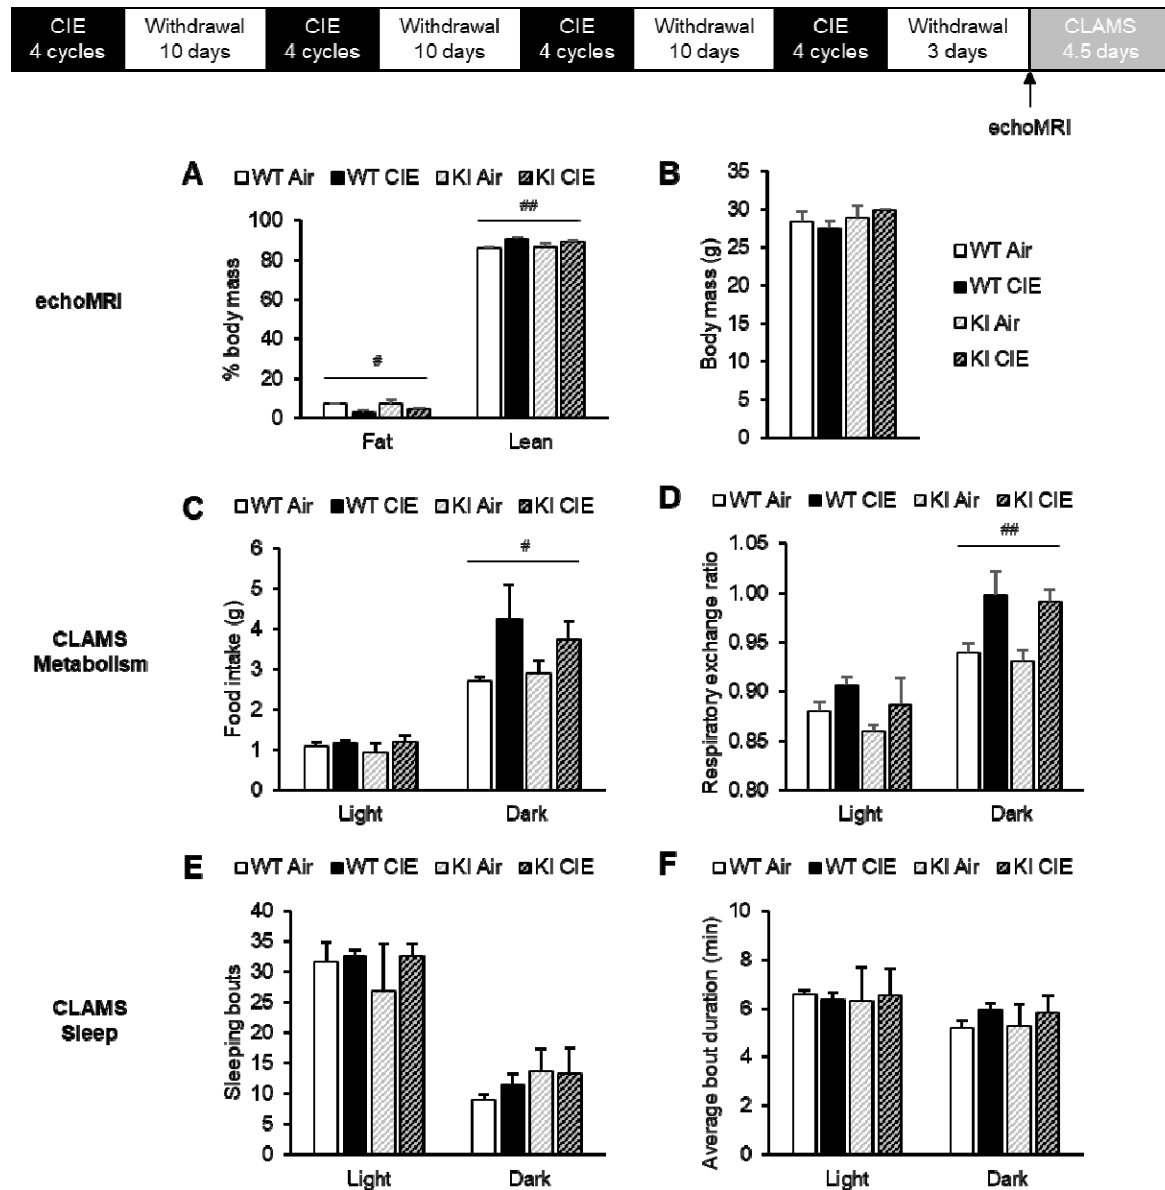

773

774 **Figure 5. The BK  $\alpha$  K361N mutation does not influence the metabolic effects of chronic**  
 775 **intermittent ethanol (CIE) exposure**

776 BK  $\alpha$  K361N WT (n=8) and KI (n=7) mice were exposed to air or chronic intermittent ethanol  
 777 (CIE) vapor inhalation. Body composition was determined 3 days into withdrawal (A-B). Food  
 778 intake (C), respiratory exchange ratio (D), sleep bout number (E) and duration (F) were then  
 779 recorded in metabolic chambers during 4.5 days. Main effect of vapor: #, p<0.05; ##, p<0.01.  
 780 None of the measures was significantly affected by genotype. Main effects of circadian phase  
 781 are not shown (see *Table 1* for details). Data are shown as mean  $\pm$  s.e.m.

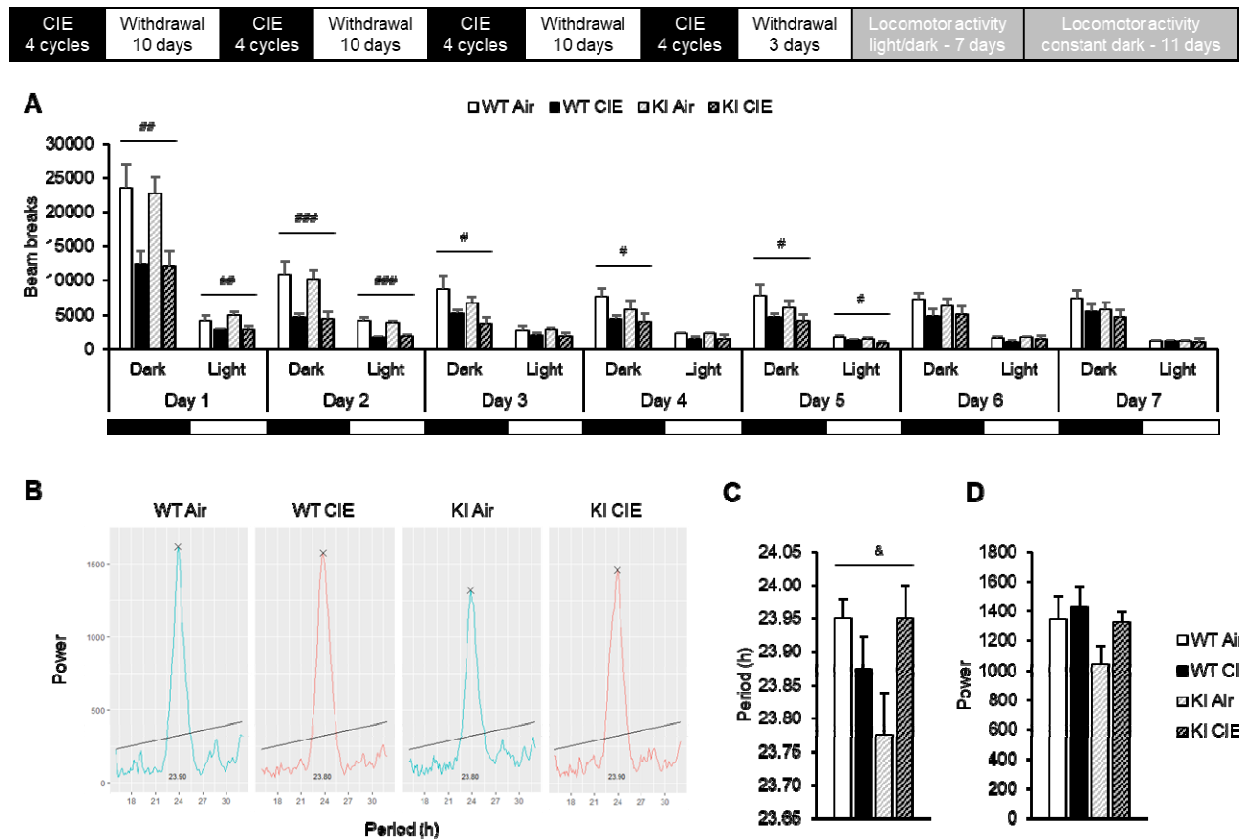

782

783 **Figure 6. The BK  $\alpha$  K361N mutation does not influence activity changes induced by**  
 784 **chronic intermittent ethanol (CIE) exposure**

785 BK  $\alpha$  K361N WT (n=8) and KI (n=8) mice were exposed to air or chronic intermittent ethanol

786 (CIE) vapor inhalation. Locomotor activity was recorded starting 3 days into withdrawal (**A**). CIE

787 significantly reduced ambulation up to withdrawal day 8 (#, p<0.05; ##, p<0.01; ###, p<0.001).

788 After 7 days, mice were switched to constant darkness and periodogram analysis

789 (representative plots shown in **B**) was used to determine the free-running circadian period

790 length (**C**) and relative power (**D**). There was a significant genotype x vapor interaction on the

791 period (&, p<0.05) but none of the pairwise comparisons reached significance. Data are shown

792 as mean  $\pm$  s.e.m.

|                                    | <b>Genotype</b>             | <b>Vapor</b>                | <b>Genotype x Vapor</b>     | <b>Phase</b>                  | <b>Phase x Genotype</b>     | <b>Phase x Vapor</b>        | <b>Phase x Genotype x Vapor</b> |
|------------------------------------|-----------------------------|-----------------------------|-----------------------------|-------------------------------|-----------------------------|-----------------------------|---------------------------------|
| <b>Food intake</b>                 | $F_{1,10}=0.25$<br>$p=0.63$ | $F_{1,10}=9.3$<br>$p=0.012$ | $F_{1,10}=0.37$<br>$p=0.56$ | $F_{1,10}=89.7$<br>$P<0.0001$ | $F_{1,10}=0.02$<br>$p=0.88$ | $F_{1,10}=4.4$<br>$p=0.063$ | $F_{1,10}=0.84$<br>$p=0.38$     |
| <b>Respiratory exchange ratio</b>  | $F_{1,10}=0.98$<br>$p=0.34$ | $F_{1,10}=9.4$<br>$p=0.012$ | $F_{1,10}<0.01$<br>$p=0.96$ | $F_{1,10}=234$<br>$P<0.0001$  | $F_{1,10}=1.4$<br>$p=0.26$  | $F_{1,10}=9.5$<br>$p=0.011$ | $F_{1,10}<0.01$<br>$p=0.93$     |
| <b>Sleeping bouts</b>              | $F_{1,11}=0.02$<br>$p=0.90$ | $F_{1,11}=0.4$<br>$p=0.54$  | $F_{1,11}=0.02$<br>$p=0.90$ | $F_{1,11}=81.1$<br>$P<0.0001$ | $F_{1,11}=1.8$<br>$p=0.20$  | $F_{1,11}=0.3$<br>$p=0.60$  | $F_{1,11}=0.8$<br>$p=0.39$      |
| <b>Average sleep bout duration</b> | $F_{1,11}<0.01$<br>$p=0.97$ | $F_{1,11}=0.2$<br>$p=0.66$  | $F_{1,11}<0.01$<br>$p=0.94$ | $F_{1,11}=17.9$<br>$P=0.0014$ | $F_{1,11}<0.01$<br>$p=0.97$ | $F_{1,11}=2.2$<br>$p=0.17$  | $F_{1,11}=0.7$<br>$p=0.41$      |

793

794 **Table 1.** RM-ANOVAs were conducted to analyze the influence of genotype and alcohol vapor

795 exposure on metabolic and sleep parameters during the light and dark phases. Data were

796 collected over 4 consecutive periods of 24 h, starting 3 days after the last vapor exposure.

797 Corresponding data are plotted in Figure 5.
